# Supplementary material for: Thermal Analyses and Responses of Bridge Deck Hydronic Snow Melting System
Source: Hindawi journal article supplement (doi:10.1155/2019/8172494), 2019-01-01
Supplement: f1 [file 8172494.f1.zip]

Archive with 22 entries (16 files):
- 8172494.f1/insulated bottom/
- 8172494.f1/insulated bottom/spacing of 30mm, depth of 11cm.txt
- 8172494.f1/insulated bottom/without embedded pipes.txt
- 8172494.f1/non-insulated bottom/
- 8172494.f1/non-insulated bottom/spacing of 30mm, depth of 11cm.txt
- 8172494.f1/non-insulated bottom/with embedded pipes.txt
- 8172494.f1/spacing of 10mm/
- 8172494.f1/spacing of 10mm/depth of 11mm.txt
- 8172494.f1/spacing of 10mm/depth of 7mm.txt
- 8172494.f1/spacing of 10mm/depth of 9mm.txt
- 8172494.f1/spacing of 15mm/
- 8172494.f1/spacing of 15mm/depth of 11mm.txt
- 8172494.f1/spacing of 15mm/depth of 7mm.txt
- 8172494.f1/spacing of 15mm/depth of 9mm.txt
- 8172494.f1/spacing of 20mm/
- 8172494.f1/spacing of 20mm/depth of 11mm.txt
- 8172494.f1/spacing of 20mm/depth of 7mm.txt
- 8172494.f1/spacing of 20mm/depth of 9mm.txt
- 8172494.f1/spacing of 30mm/
- 8172494.f1/spacing of 30mm/depth of 11mm.txt
- 8172494.f1/spacing of 30mm/depth of 7mm.txt
- 8172494.f1/spacing of 30mm/depth of 9mm.txt
