# Supplementary material for: Thermal Analyses and Responses of Bridge Deck Hydronic Snow Melting System
Source: Hindawi journal article supplement (doi:10.1155/2019/8172494), 2019-01-01
Supplement: f1 [file 8172494.f1.zip › 8172494.f1/insulated bottom/spacing of 30mm, depth of 11cm.txt]

/PREP7  
*SET,pi,acos(-1)
*SET,d,0.02
*SET,L,0.2 
*SET,dens,1000  

*SET,carea,pi*(d**2)/4  

*SET,width,0.3
*SET,high,0.11 
*SET,high1,0.21


*SET,T1,-5  
*SET,T2,15  

ET,1,FLUID116   
!*  
KEYOPT,1,1,1
KEYOPT,1,2,2
KEYOPT,1,4,1
KEYOPT,1,5,0
!*  
ET,2,SOLID70

ET,3,SURF152
KEYOPT,3,1,0
KEYOPT,3,2,0
KEYOPT,3,3,0
KEYOPT,3,4,1
KEYOPT,3,5,0
KEYOPT,3,6,0
KEYOPT,3,7,0
KEYOPT,3,8,2
KEYOPT,3,9,0

ET,4,PLANE55

R,1,d,carea,1   
RMORE,pi*d*L/2,pi*d*L/2,0,0.023,0.8,0.3 
R,3, , , , , ,  
MP,KXX,1,2.16   

MP,C,1,4.187
 
MP,DENS,1,1000 
 
MP,VISC,1,3.96  
  
MP,KXX,2,9.66 
 
MP,C,2,0.966
 
MP,DENS,2,2450 


MP,KXX,4,5.54  
 
MP,C,4,1.68
 
MP,DENS,4,2100 


RECTNG,0,5*width,0,high1,
WPSTYLE,,,,,,,,1
wpoff,width/2,high1-high,0  
wpro,,90.000000,
ASBW,       1   
wpoff,0,0,-0.06
ASBW,all   
wpro,,,90.000000
aSBW,all  
*do,i,1,4
wpoff,0,0,width 
aSBW,all
*enddo
WPSTYLE,,,,,,,,0

TYPE,   4   
MAT,       2
REAL,       3    


LESIZE,2, , ,5, , , , ,1  
LESIZE,4, , ,5, , , , ,1  
LESIZE,11, , ,6, , , , ,1 
LESIZE,12, , ,6, , , , ,1   

LESIZE,5, , ,6,0.5, , , ,1
LESIZE,6, , ,6,0.5, , , ,1 
LESIZE,18, , ,6,0.5, , , ,1 
*do,i,23,44,7
LESIZE,i, , ,6,0.5, , , ,1 
*enddo
LESIZE,17, , ,5, , , , ,1 
LESIZE,43, , ,5, , , , ,1 

LESIZE,28, , ,10, , , , ,1 
LESIZE,35, , ,10, , , , ,1 
LESIZE,42, , ,10, , , , ,1 
LESIZE,49, , ,10, , , , ,1

MSHAPE,0,2D 
MSHKEY,1
AMESH,all 
TYPE,   2   
MAT,       2
REAL,       3   
ESYS,       0   
ESIZE,0,30, 
VEXT,all, , ,0,0,6,,,, 

NSEL,S,LOC,Y,0.17,0.21  
ESLN,S  
EMODIF,all,MAT,4,  
allsel,all


TYPE,   3   
MAT,       4
REAL,       3   
ESYS,       0  
NSEL,S,LOC,Y,0.21   
ESURF,0    

ALLSEL,ALL 

TYPE,   1  
MAT,       1
REAL,       1   
ESYS,       0   
NSEL,S,LOC,Y,high1-high 
NSEL,R,LOC,X,0.5*width,4.5*width
NSEL,U,LOC,X,0.5*width+0.001,1.5*width-0.001
NSEL,U,LOC,X,1.5*width+0.001,2.5*width-0.001
NSEL,U,LOC,X,2.5*width+0.001,3.5*width-0.001 
NSEL,U,LOC,X,3.5*width+0.001,4.5*width-0.001 
NPLOT   

N,58000,0.5*width,high1-high,0,,,,  
N,58030,0.5*width,high1-high,6,,,,  
FILL,58000,58030,29, , ,1,1,1
 
N,58031,1.5*width,high1-high,6,,,,  
N,58061,1.5*width,high1-high,0,,,,  
FILL,58031,58061,29, , ,1,1,1

N,58062,2.5*width,high1-high,0,,,,  
N,58092,2.5*width,high1-high,6,,,,  
FILL,58062,58092,29, , ,1,1,1
 
N,58093,3.5*width,high1-high,6,,,,  
N,58123,3.5*width,high1-high,0,,,,  
FILL,58093,58123,29, , ,1,1,1

N,58124,4.5*width,high1-high,0,,,,  
N,58154,4.5*width,high1-high,6,,,,  
FILL,58124,58154,29, , ,1,1,1


e,58000,58001,79,3208
*do,i,58001,58028
e,i,i+1,i-54793,i-54792
*enddo
e,58029,58030,3236,3085
e,58030,58031,3085,10109
e,58031,58032,10109,10226
*do,i,58032,58059
e,i,i+1,68258-i,68257-i
*enddo
e,58060,58061,10198,317
e,58061,58062,317,497
e,58062,58063,497,15598
*do,i,58063,58090
e,i,i+1,i-42465,i-42464
*enddo
e,58091,58092,15626,15509
e,58092,58093,15509,20729
e,58093,58094,20729,20846
*do,i,58094,58121
e,i,i+1,78940-i,78939-i
*enddo
e,58122,58123,20818,671
e,58123,58124,671,127
e,58124,58125,127,4468
*do,i,58125,58152
e,i,i+1,i-53657,i-53656
*enddo
e,58153,58154,4496,4351

ALLSEL,ALL 
ESEL,S,TYPE,,4  
ACLEAR,all
ALLSEL,ALL 


FINISH 
/SOLU 
ESEL,S,TYPE,,2  
ESEL,A,TYPE,,3  
NSLE,S 
IC,all,TEMP,-2.5,  

*DEL,_FNCNAME   
*DEL,_FNCMTID   
*DEL,_FNCCSYS   
*SET,_FNCNAME,'hw'  
*SET,_FNCCSYS,0 
! /INPUT,temp3.func,,,1 
*DIM,%_FNCNAME%,TABLE,6,24,1,,,,%_FNCCSYS%  
!   
! Begin of equation: 2.5*(0.96*sin(PI*({TIME}-9)/12)+0.14*sin(PI*({TIME}-9)/6)) 
! -2.5  
*SET,%_FNCNAME%(0,0,1), 0.0, -999   
*SET,%_FNCNAME%(2,0,1), 0.0 
*SET,%_FNCNAME%(3,0,1), 0.0 
*SET,%_FNCNAME%(4,0,1), 0.0 
*SET,%_FNCNAME%(5,0,1), 0.0 
*SET,%_FNCNAME%(6,0,1), 0.0 
*SET,%_FNCNAME%(0,1,1), 1.0, -1, 0, 9, 0, 0, 1  
*SET,%_FNCNAME%(0,2,1), 0.0, -2, 0, 1, 1, 2, -1 
*SET,%_FNCNAME%(0,3,1),   0, -1, 0, 3.14159265358979310, 0, 0, -2   
*SET,%_FNCNAME%(0,4,1), 0.0, -3, 0, 1, -1, 3, -2
*SET,%_FNCNAME%(0,5,1), 0.0, -1, 0, 12, 0, 0, -3
*SET,%_FNCNAME%(0,6,1), 0.0, -2, 0, 1, -3, 4, -1
*SET,%_FNCNAME%(0,7,1), 0.0, -1, 9, 1, -2, 0, 0 
*SET,%_FNCNAME%(0,8,1), 0.0, -2, 0, 0.96, 0, 0, -1  
*SET,%_FNCNAME%(0,9,1), 0.0, -3, 0, 1, -2, 3, -1
*SET,%_FNCNAME%(0,10,1), 0.0, -1, 0, 9, 0, 0, 1 
*SET,%_FNCNAME%(0,11,1), 0.0, -2, 0, 1, 1, 2, -1
*SET,%_FNCNAME%(0,12,1), 0.0, -1, 0, 3.14159265358979310, 0, 0, -2  
*SET,%_FNCNAME%(0,13,1), 0.0, -4, 0, 1, -1, 3, -2   
*SET,%_FNCNAME%(0,14,1), 0.0, -1, 0, 6, 0, 0, -4
*SET,%_FNCNAME%(0,15,1), 0.0, -2, 0, 1, -4, 4, -1   
*SET,%_FNCNAME%(0,16,1), 0.0, -1, 9, 1, -2, 0, 0
*SET,%_FNCNAME%(0,17,1), 0.0, -2, 0, 0.14, 0, 0, -1 
*SET,%_FNCNAME%(0,18,1), 0.0, -4, 0, 1, -2, 3, -1   
*SET,%_FNCNAME%(0,19,1), 0.0, -1, 0, 1, -3, 1, -4   
*SET,%_FNCNAME%(0,20,1), 0.0, -2, 0, 2.5, 0, 0, -1  
*SET,%_FNCNAME%(0,21,1), 0.0, -3, 0, 1, -2, 3, -1   
*SET,%_FNCNAME%(0,22,1), 0.0, -1, 0, 2.5, 0, 0, -3  
*SET,%_FNCNAME%(0,23,1), 0.0, -2, 0, 1, -3, 2, -1   
*SET,%_FNCNAME%(0,24,1), 0.0, 99, 0, 1, -2, 0, 0
! End of equation: 2.5*(0.96*sin(PI*({TIME}-9)/12)+0.14*sin(PI*({TIME}-9)/6))-2 
! .5
!-->


ESEL,S,TYPE,,3  
SFE,all,1,CONV, ,26.3   
SFE,all,1,CONV,2, %HW% 

ALLSEL,ALL 


ASEL,S,LOC,X,0  
ASEL,A,LOC,X,5*width
ASEL,A,LOC,Y,0  
ASEL,A,LOC,Z,0  
ASEL,A,LOC,Z,6 
NSLA,S,1
SF,all,HFLUX,0 
ALLSEL,ALL 


ANTYPE,4
DELTIM,2,0,0
OUTRES,ERASE
OUTRES,ALL,1
KBC,0.0 
TIME,88
TIMINT,1
TOFFST,273, 

solve

DELTIM,0.02,0,0  
TIME,88.02
d,58000,temp,15 
esel,s,ename,,fluid116  
sfe,all,,hflux,,2160*carea*dens 
ALLSEL,ALL  
solve
DELTIM,0.25,0,0  
TIME,91.5
solve


NSEL,S,LOC,Y,0.21   
NSEL,R,LOC,Z,6  
NPLOT   
FLST,2,51,1 
FITEM,2,1999
FITEM,2,2001
FITEM,2,2002
FITEM,2,2003
FITEM,2,2004
FITEM,2,2000
FITEM,2,8479
FITEM,2,8480
FITEM,2,8481
FITEM,2,8482
FITEM,2,8483
FITEM,2,8484
FITEM,2,8485
FITEM,2,8486
FITEM,2,8487
FITEM,2,6499
FITEM,2,6501
FITEM,2,6502
FITEM,2,6503
FITEM,2,6504
FITEM,2,6505
FITEM,2,6506
FITEM,2,6507
FITEM,2,6508
FITEM,2,6509
FITEM,2,6500
FITEM,2,19099   
FITEM,2,19100   
FITEM,2,19101   
FITEM,2,19102   
FITEM,2,19103   
FITEM,2,19104   
FITEM,2,19105   
FITEM,2,19106   
FITEM,2,19107   
FITEM,2,13699   
FITEM,2,13700   
FITEM,2,13701   
FITEM,2,13702   
FITEM,2,13703   
FITEM,2,13704   
FITEM,2,13705   
FITEM,2,13706   
FITEM,2,13707   
FITEM,2,13708   
FITEM,2,925 
FITEM,2,929 
FITEM,2,928 
FITEM,2,927 
FITEM,2,926 
FITEM,2,919 
!*  
PATH,t,51,10,1, 
PPATH,P51X,1
PATH,STAT   
!*  
!*  
PDEF,r,TEMP, ,AVG   
/PBC,PATH, ,0   
!*  
