# Supplementary material for: Thermal Analyses and Responses of Bridge Deck Hydronic Snow Melting System
Source: Hindawi journal article supplement (doi:10.1155/2019/8172494), 2019-01-01
Supplement: f1 [file 8172494.f1.zip › 8172494.f1/insulated bottom/without embedded pipes.txt]

 PRINT TEMP NODAL SOLUTION PER NODE
 
  ***** POST1 NODAL DEGREE OF FREEDOM LISTING *****                            
 
  LOAD STEP=     3  SUBSTEP=    17                                             
   TIME=    82.250      LOAD CASE=   0                                         
 
    NODE      TEMP  
       1  0.14346    
       7   1.5177    
       8  0.25459    
       9  0.56366    
      10  0.98571    
      11   1.3637    
      37  0.50944    
      38   1.9989    
      39  0.63090    
      40  0.96829    
      41   1.4278    
      42   1.8369    
     187   1.7496    
     188   1.7615    
     189   1.5843    
     190   1.1880    
     191  0.74791    
     192  0.42755    
     193  0.31523    
     194  0.43587    
     195  0.76336    
     196   1.2078    
     197   1.6037    
     253   1.8218    
     254   1.3961    
     255  0.91694    
     256  0.55560    
     257  0.40500    
     258  0.49221    
     259  0.79203    
     260   1.2153    
     261   1.5973    
     427   1.5352    
     428   1.3760    
     429  0.99459    
     430  0.57016    
     431  0.25937    
     432  0.14694    
     433  0.25706    
 
  ***** POST1 NODAL DEGREE OF FREEDOM LISTING *****                            
 
  LOAD STEP=     3  SUBSTEP=    17                                             
   TIME=    82.250      LOAD CASE=   0                                         
 
    NODE      TEMP  
     434  0.56534    
     435  0.98674    
     436   1.3642    
     607   1.5930    
     608   1.1854    
     609  0.72702    
     610  0.38230    
     611  0.24016    
     612  0.32605    
     613  0.61541    
     614   1.0224    
     615   1.3893    
     919  0.41690E-01
     925   1.3799    
     926  0.14928    
     927  0.44864    
     928  0.85797    
     929   1.2261    
     955  0.13337    
     956  0.12221    
     957  0.11748    
     958  0.11447    
     959  0.11152    
     960  0.10858    
     961  0.10565    
     962  0.10272    
     963  0.99793E-01
     964  0.96869E-01
     965  0.93948E-01
     966  0.91030E-01
     967  0.88116E-01
     968  0.85204E-01
     969  0.82296E-01
     970  0.79391E-01
     971  0.76489E-01
     972  0.73590E-01
     973  0.70694E-01
     974  0.67802E-01
     975  0.64912E-01
 
  ***** POST1 NODAL DEGREE OF FREEDOM LISTING *****                            
 
  LOAD STEP=     3  SUBSTEP=    17                                             
   TIME=    82.250      LOAD CASE=   0                                         
 
    NODE      TEMP  
     976  0.62026E-01
     977  0.59143E-01
     978  0.56263E-01
     979  0.53386E-01
     980  0.50516E-01
     981  0.47664E-01
     982  0.44905E-01
     983  0.42628E-01
    1013   1.4952    
    1014   1.4800    
    1015   1.4753    
    1016   1.4715    
    1017   1.4678    
    1018   1.4641    
    1019   1.4604    
    1020   1.4566    
    1021   1.4529    
    1022   1.4492    
    1023   1.4455    
    1024   1.4419    
    1025   1.4382    
    1026   1.4345    
    1027   1.4308    
    1028   1.4271    
    1029   1.4235    
    1030   1.4198    
    1031   1.4161    
    1032   1.4125    
    1033   1.4088    
    1034   1.4052    
    1035   1.4015    
    1036   1.3979    
    1037   1.3942    
    1038   1.3906    
    1039   1.3870    
    1040   1.3836    
    1041   1.3810    
    1187  0.24356    
    1188  0.23203    
 
  ***** POST1 NODAL DEGREE OF FREEDOM LISTING *****                            
 
  LOAD STEP=     3  SUBSTEP=    17                                             
   TIME=    82.250      LOAD CASE=   0                                         
 
    NODE      TEMP  
    1189  0.22728    
    1190  0.22419    
    1191  0.22115    
    1192  0.21813    
    1193  0.21511    
    1194  0.21209    
    1195  0.20908    
    1196  0.20607    
    1197  0.20307    
    1198  0.20006    
    1199  0.19707    
    1200  0.19407    
    1201  0.19108    
    1202  0.18809    
    1203  0.18510    
    1204  0.18212    
    1205  0.17914    
    1206  0.17616    
    1207  0.17319    
    1208  0.17022    
    1209  0.16725    
    1210  0.16429    
    1211  0.16133    
    1212  0.15838    
    1213  0.15544    
    1214  0.15260    
    1215  0.15025    
    1216  0.54995    
    1217  0.53741    
    1218  0.53262    
    1219  0.52929    
    1220  0.52602    
    1221  0.52277    
    1222  0.51953    
    1223  0.51628    
    1224  0.51304    
    1225  0.50980    
    1226  0.50657    
    1227  0.50334    
 
  ***** POST1 NODAL DEGREE OF FREEDOM LISTING *****                            
 
  LOAD STEP=     3  SUBSTEP=    17                                             
   TIME=    82.250      LOAD CASE=   0                                         
 
    NODE      TEMP  
    1228  0.50011    
    1229  0.49689    
    1230  0.49367    
    1231  0.49045    
    1232  0.48724    
    1233  0.48403    
    1234  0.48082    
    1235  0.47762    
    1236  0.47442    
    1237  0.47122    
    1238  0.46803    
    1239  0.46484    
    1240  0.46165    
    1241  0.45847    
    1242  0.45531    
    1243  0.45226    
    1244  0.44970    
    1245  0.96818    
    1246  0.95436    
    1247  0.94953    
    1248  0.94590    
    1249  0.94234    
    1250  0.93880    
    1251  0.93526    
    1252  0.93172    
    1253  0.92819    
    1254  0.92466    
    1255  0.92113    
    1256  0.91761    
    1257  0.91409    
    1258  0.91058    
    1259  0.90707    
    1260  0.90356    
    1261  0.90006    
    1262  0.89656    
    1263  0.89306    
    1264  0.88957    
    1265  0.88608    
    1266  0.88259    
 
  ***** POST1 NODAL DEGREE OF FREEDOM LISTING *****                            
 
  LOAD STEP=     3  SUBSTEP=    17                                             
   TIME=    82.250      LOAD CASE=   0                                         
 
    NODE      TEMP  
    1267  0.87911    
    1268  0.87564    
    1269  0.87216    
    1270  0.86869    
    1271  0.86525    
    1272  0.86193    
    1273  0.85914    
    1274   1.3426    
    1275   1.3277    
    1276   1.3229    
    1277   1.3191    
    1278   1.3153    
    1279   1.3116    
    1280   1.3078    
    1281   1.3041    
    1282   1.3003    
    1283   1.2966    
    1284   1.2928    
    1285   1.2891    
    1286   1.2854    
    1287   1.2817    
    1288   1.2779    
    1289   1.2742    
    1290   1.2705    
    1291   1.2668    
    1292   1.2631    
    1293   1.2594    
    1294   1.2557    
    1295   1.2520    
    1296   1.2483    
    1297   1.2447    
    1298   1.2410    
    1299   1.2373    
    1300   1.2337    
    1301   1.2302    
    1302   1.2273    
    1999  0.43678    
    2000   1.9174    
    2001  0.55673    
 
  ***** POST1 NODAL DEGREE OF FREEDOM LISTING *****                            
 
  LOAD STEP=     3  SUBSTEP=    17                                             
   TIME=    82.250      LOAD CASE=   0                                         
 
    NODE      TEMP  
    2002  0.89016    
    2003   1.3450    
    2004   1.7520    
    2035  0.50800    
    2036  0.50504    
    2037  0.50179    
    2038  0.49849    
    2039  0.49516    
    2040  0.49183    
    2041  0.48850    
    2042  0.48518    
    2043  0.48186    
    2044  0.47854    
    2045  0.47523    
    2046  0.47192    
    2047  0.46862    
    2048  0.46532    
    2049  0.46202    
    2050  0.45873    
    2051  0.45544    
    2052  0.45215    
    2053  0.44887    
    2054  0.44559    
    2055  0.44231    
    2056  0.43904    
    2057  0.43577    
    2058  0.43251    
    2059  0.42925    
    2060  0.42600    
    2061  0.42283    
    2062  0.42161    
    2063  0.42823    
    2093   1.9967    
    2094   1.9933    
    2095   1.9898    
    2096   1.9857    
    2097   1.9814    
    2098   1.9772    
    2099   1.9731    
 
  ***** POST1 NODAL DEGREE OF FREEDOM LISTING *****                            
 
  LOAD STEP=     3  SUBSTEP=    17                                             
   TIME=    82.250      LOAD CASE=   0                                         
 
    NODE      TEMP  
    2100   1.9689    
    2101   1.9647    
    2102   1.9606    
    2103   1.9564    
    2104   1.9523    
    2105   1.9482    
    2106   1.9440    
    2107   1.9399    
    2108   1.9358    
    2109   1.9317    
    2110   1.9275    
    2111   1.9234    
    2112   1.9193    
    2113   1.9152    
    2114   1.9111    
    2115   1.9070    
    2116   1.9029    
    2117   1.8989    
    2118   1.8948    
    2119   1.8908    
    2120   1.8878    
    2121   1.8968    
    2383  0.62939    
    2384  0.62634    
    2385  0.62301    
    2386  0.61962    
    2387  0.61619    
    2388  0.61277    
    2389  0.60935    
    2390  0.60593    
    2391  0.60252    
    2392  0.59911    
    2393  0.59571    
    2394  0.59231    
    2395  0.58892    
    2396  0.58552    
    2397  0.58213    
    2398  0.57875    
    2399  0.57537    
 
  ***** POST1 NODAL DEGREE OF FREEDOM LISTING *****                            
 
  LOAD STEP=     3  SUBSTEP=    17                                             
   TIME=    82.250      LOAD CASE=   0                                         
 
    NODE      TEMP  
    2400  0.57199    
    2401  0.56862    
    2402  0.56525    
    2403  0.56188    
    2404  0.55852    
    2405  0.55516    
    2406  0.55180    
    2407  0.54845    
    2408  0.54511    
    2409  0.54185    
    2410  0.54046    
    2411  0.54728    
    2412  0.96657    
    2413  0.96328    
    2414  0.95974    
    2415  0.95610    
    2416  0.95242    
    2417  0.94874    
    2418  0.94507    
    2419  0.94141    
    2420  0.93775    
    2421  0.93409    
    2422  0.93044    
    2423  0.92679    
    2424  0.92315    
    2425  0.91951    
    2426  0.91587    
    2427  0.91224    
    2428  0.90861    
    2429  0.90498    
    2430  0.90136    
    2431  0.89775    
    2432  0.89413    
    2433  0.89052    
    2434  0.88692    
    2435  0.88331    
    2436  0.87971    
    2437  0.87614    
    2438  0.87263    
 
  ***** POST1 NODAL DEGREE OF FREEDOM LISTING *****                            
 
  LOAD STEP=     3  SUBSTEP=    17                                             
   TIME=    82.250      LOAD CASE=   0                                         
 
    NODE      TEMP  
    2439  0.87078    
    2440  0.87815    
    2441   1.4258    
    2442   1.4222    
    2443   1.4184    
    2444   1.4145    
    2445   1.4105    
    2446   1.4065    
    2447   1.4025    
    2448   1.3985    
    2449   1.3945    
    2450   1.3906    
    2451   1.3866    
    2452   1.3826    
    2453   1.3787    
    2454   1.3747    
    2455   1.3708    
    2456   1.3668    
    2457   1.3629    
    2458   1.3589    
    2459   1.3550    
    2460   1.3511    
    2461   1.3471    
    2462   1.3432    
    2463   1.3393    
    2464   1.3354    
    2465   1.3315    
    2466   1.3276    
    2467   1.3238    
    2468   1.3213    
    2469   1.3294    
    2470   1.8347    
    2471   1.8311    
    2472   1.8272    
    2473   1.8230    
    2474   1.8188    
    2475   1.8146    
    2476   1.8103    
    2477   1.8061    
 
  ***** POST1 NODAL DEGREE OF FREEDOM LISTING *****                            
 
  LOAD STEP=     3  SUBSTEP=    17                                             
   TIME=    82.250      LOAD CASE=   0                                         
 
    NODE      TEMP  
    2478   1.8019    
    2479   1.7977    
    2480   1.7935    
    2481   1.7894    
    2482   1.7852    
    2483   1.7810    
    2484   1.7768    
    2485   1.7726    
    2486   1.7685    
    2487   1.7643    
    2488   1.7601    
    2489   1.7560    
    2490   1.7518    
    2491   1.7477    
    2492   1.7436    
    2493   1.7394    
    2494   1.7353    
    2495   1.7312    
    2496   1.7272    
    2497   1.7242    
    2498   1.7328    
    6499   1.8990    
    6500   1.6637    
    6501   1.7252    
    6502   1.3067    
    6503  0.83633    
    6504  0.48254    
    6505  0.33654    
    6506  0.42449    
    6507  0.72110    
    6508   1.1383    
    6509   1.5142    
    6565   1.7179    
    6566   1.7648    
    6567   1.7755    
    6568   1.7727    
    6569   1.7759    
    6570   1.7794    
    6571   1.7829    
 
  ***** POST1 NODAL DEGREE OF FREEDOM LISTING *****                            
 
  LOAD STEP=     3  SUBSTEP=    17                                             
   TIME=    82.250      LOAD CASE=   0                                         
 
    NODE      TEMP  
    6572   1.7864    
    6573   1.7899    
    6574   1.7934    
    6575   1.7969    
    6576   1.8004    
    6577   1.8039    
    6578   1.8075    
    6579   1.8110    
    6580   1.8145    
    6581   1.8181    
    6582   1.8216    
    6583   1.8252    
    6584   1.8287    
    6585   1.8323    
    6586   1.8359    
    6587   1.8394    
    6588   1.8430    
    6589   1.8466    
    6590   1.8502    
    6591   1.8539    
    6592   1.8585    
    6593   1.8746    
    6623   1.7384    
    6624   1.7240    
    6625   1.7203    
    6626   1.7168    
    6627   1.7132    
    6628   1.7097    
    6629   1.7062    
    6630   1.7028    
    6631   1.6993    
    6632   1.6958    
    6633   1.6923    
    6634   1.6889    
    6635   1.6854    
    6636   1.6820    
    6637   1.6785    
    6638   1.6751    
    6639   1.6716    
 
  ***** POST1 NODAL DEGREE OF FREEDOM LISTING *****                            
 
  LOAD STEP=     3  SUBSTEP=    17                                             
   TIME=    82.250      LOAD CASE=   0                                         
 
    NODE      TEMP  
    6640   1.6682    
    6641   1.6648    
    6642   1.6614    
    6643   1.6579    
    6644   1.6545    
    6645   1.6511    
    6646   1.6477    
    6647   1.6443    
    6648   1.6409    
    6649   1.6376    
    6650   1.6352    
    6651   1.6441    
    6913   1.5556    
    6914   1.5985    
    6915   1.6089    
    6916   1.6064    
    6917   1.6092    
    6918   1.6125    
    6919   1.6158    
    6920   1.6191    
    6921   1.6224    
    6922   1.6257    
    6923   1.6290    
    6924   1.6323    
    6925   1.6356    
    6926   1.6389    
    6927   1.6422    
    6928   1.6455    
    6929   1.6488    
    6930   1.6522    
    6931   1.6555    
    6932   1.6588    
    6933   1.6622    
    6934   1.6655    
    6935   1.6689    
    6936   1.6722    
    6937   1.6756    
    6938   1.6790    
    6939   1.6824    
 
  ***** POST1 NODAL DEGREE OF FREEDOM LISTING *****                            
 
  LOAD STEP=     3  SUBSTEP=    17                                             
   TIME=    82.250      LOAD CASE=   0                                         
 
    NODE      TEMP  
    6940   1.6870    
    6941   1.7025    
    6942   1.1667    
    6943   1.1999    
    6944   1.2096    
    6945   1.2076    
    6946   1.2097    
    6947   1.2124    
    6948   1.2151    
    6949   1.2178    
    6950   1.2205    
    6951   1.2232    
    6952   1.2259    
    6953   1.2286    
    6954   1.2313    
    6955   1.2340    
    6956   1.2367    
    6957   1.2395    
    6958   1.2422    
    6959   1.2449    
    6960   1.2476    
    6961   1.2504    
    6962   1.2531    
    6963   1.2559    
    6964   1.2586    
    6965   1.2614    
    6966   1.2641    
    6967   1.2669    
    6968   1.2698    
    6969   1.2739    
    6970   1.2880    
    6971  0.73403    
    6972  0.75627    
    6973  0.76450    
    6974  0.76296    
    6975  0.76421    
    6976  0.76610    
    6977  0.76795    
    6978  0.76982    
 
  ***** POST1 NODAL DEGREE OF FREEDOM LISTING *****                            
 
  LOAD STEP=     3  SUBSTEP=    17                                             
   TIME=    82.250      LOAD CASE=   0                                         
 
    NODE      TEMP  
    6979  0.77169    
    6980  0.77357    
    6981  0.77545    
    6982  0.77734    
    6983  0.77922    
    6984  0.78112    
    6985  0.78301    
    6986  0.78491    
    6987  0.78682    
    6988  0.78872    
    6989  0.79064    
    6990  0.79255    
    6991  0.79447    
    6992  0.79639    
    6993  0.79832    
    6994  0.80025    
    6995  0.80218    
    6996  0.80414    
    6997  0.80615    
    6998  0.80977    
    6999  0.82200    
    7000  0.41847    
    7001  0.43099    
    7002  0.43712    
    7003  0.43592    
    7004  0.43624    
    7005  0.43721    
    7006  0.43815    
    7007  0.43911    
    7008  0.44007    
    7009  0.44104    
    7010  0.44201    
    7011  0.44298    
    7012  0.44395    
    7013  0.44493    
    7014  0.44591    
    7015  0.44690    
    7016  0.44789    
    7017  0.44888    
 
  ***** POST1 NODAL DEGREE OF FREEDOM LISTING *****                            
 
  LOAD STEP=     3  SUBSTEP=    17                                             
   TIME=    82.250      LOAD CASE=   0                                         
 
    NODE      TEMP  
    7018  0.44988    
    7019  0.45088    
    7020  0.45188    
    7021  0.45289    
    7022  0.45390    
    7023  0.45492    
    7024  0.45594    
    7025  0.45697    
    7026  0.45807    
    7027  0.46097    
    7028  0.47146    
    7029  0.30768    
    7030  0.31249    
    7031  0.31626    
    7032  0.31509    
    7033  0.31454    
    7034  0.31454    
    7035  0.31456    
    7036  0.31458    
    7037  0.31460    
    7038  0.31463    
    7039  0.31466    
    7040  0.31470    
    7041  0.31473    
    7042  0.31478    
    7043  0.31482    
    7044  0.31487    
    7045  0.31492    
    7046  0.31498    
    7047  0.31504    
    7048  0.31510    
    7049  0.31516    
    7050  0.31523    
    7051  0.31531    
    7052  0.31538    
    7053  0.31546    
    7054  0.31556    
    7055  0.31572    
    7056  0.31774    
 
  ***** POST1 NODAL DEGREE OF FREEDOM LISTING *****                            
 
  LOAD STEP=     3  SUBSTEP=    17                                             
   TIME=    82.250      LOAD CASE=   0                                         
 
    NODE      TEMP  
    7057  0.32697    
    7058  0.42703    
    7059  0.42575    
    7060  0.42727    
    7061  0.42580    
    7062  0.42442    
    7063  0.42347    
    7064  0.42255    
    7065  0.42163    
    7066  0.42072    
    7067  0.41981    
    7068  0.41891    
    7069  0.41801    
    7070  0.41711    
    7071  0.41621    
    7072  0.41532    
    7073  0.41444    
    7074  0.41355    
    7075  0.41267    
    7076  0.41179    
    7077  0.41092    
    7078  0.41005    
    7079  0.40918    
    7080  0.40832    
    7081  0.40746    
    7082  0.40661    
    7083  0.40577    
    7084  0.40499    
    7085  0.40600    
    7086  0.41457    
    7087  0.75107    
    7088  0.74486    
    7089  0.74444    
    7090  0.74242    
    7091  0.74024    
    7092  0.73837    
    7093  0.73654    
    7094  0.73471    
    7095  0.73289    
 
  ***** POST1 NODAL DEGREE OF FREEDOM LISTING *****                            
 
  LOAD STEP=     3  SUBSTEP=    17                                             
   TIME=    82.250      LOAD CASE=   0                                         
 
    NODE      TEMP  
    7096  0.73107    
    7097  0.72925    
    7098  0.72744    
    7099  0.72563    
    7100  0.72383    
    7101  0.72203    
    7102  0.72023    
    7103  0.71843    
    7104  0.71664    
    7105  0.71486    
    7106  0.71307    
    7107  0.71130    
    7108  0.70952    
    7109  0.70775    
    7110  0.70598    
    7111  0.70422    
    7112  0.70247    
    7113  0.70079    
    7114  0.70069    
    7115  0.70911    
    7116   1.1909    
    7117   1.1807    
    7118   1.1787    
    7119   1.1761    
    7120   1.1732    
    7121   1.1705    
    7122   1.1678    
    7123   1.1652    
    7124   1.1625    
    7125   1.1599    
    7126   1.1573    
    7127   1.1546    
    7128   1.1520    
    7129   1.1494    
    7130   1.1468    
    7131   1.1441    
    7132   1.1415    
    7133   1.1389    
    7134   1.1363    
 
  ***** POST1 NODAL DEGREE OF FREEDOM LISTING *****                            
 
  LOAD STEP=     3  SUBSTEP=    17                                             
   TIME=    82.250      LOAD CASE=   0                                         
 
    NODE      TEMP  
    7135   1.1337    
    7136   1.1311    
    7137   1.1285    
    7138   1.1259    
    7139   1.1234    
    7140   1.1208    
    7141   1.1182    
    7142   1.1157    
    7143   1.1145    
    7144   1.1231    
    7145   1.5824    
    7146   1.5695    
    7147   1.5664    
    7148   1.5632    
    7149   1.5598    
    7150   1.5565    
    7151   1.5532    
    7152   1.5500    
    7153   1.5467    
    7154   1.5435    
    7155   1.5403    
    7156   1.5370    
    7157   1.5338    
    7158   1.5306    
    7159   1.5274    
    7160   1.5241    
    7161   1.5209    
    7162   1.5177    
    7163   1.5145    
    7164   1.5113    
    7165   1.5081    
    7166   1.5049    
    7167   1.5018    
    7168   1.4986    
    7169   1.4954    
    7170   1.4922    
    7171   1.4892    
    7172   1.4871    
    7173   1.4959    
 
  ***** POST1 NODAL DEGREE OF FREEDOM LISTING *****                            
 
  LOAD STEP=     3  SUBSTEP=    17                                             
   TIME=    82.250      LOAD CASE=   0                                         
 
    NODE      TEMP  
    8479   1.7514    
    8480   1.3439    
    8481  0.88834    
    8482  0.55406    
    8483  0.43303    
    8484  0.55161    
    8485  0.88322    
    8486   1.3356    
    8487   1.7389    
    8533   1.8199    
    8534   1.8175    
    8535   1.8147    
    8536   1.8110    
    8537   1.8072    
    8538   1.8034    
    8539   1.7996    
    8540   1.7959    
    8541   1.7921    
    8542   1.7884    
    8543   1.7847    
    8544   1.7809    
    8545   1.7772    
    8546   1.7735    
    8547   1.7698    
    8548   1.7661    
    8549   1.7624    
    8550   1.7586    
    8551   1.7549    
    8552   1.7513    
    8553   1.7476    
    8554   1.7439    
    8555   1.7402    
    8556   1.7365    
    8557   1.7329    
    8558   1.7292    
    8559   1.7256    
    8560   1.7232    
    8561   1.7321    
    8562   1.3945    
 
  ***** POST1 NODAL DEGREE OF FREEDOM LISTING *****                            
 
  LOAD STEP=     3  SUBSTEP=    17                                             
   TIME=    82.250      LOAD CASE=   0                                         
 
    NODE      TEMP  
    8563   1.3937    
    8564   1.3923    
    8565   1.3893    
    8566   1.3860    
    8567   1.3830    
    8568   1.3799    
    8569   1.3769    
    8570   1.3739    
    8571   1.3709    
    8572   1.3679    
    8573   1.3649    
    8574   1.3619    
    8575   1.3589    
    8576   1.3560    
    8577   1.3530    
    8578   1.3500    
    8579   1.3470    
    8580   1.3441    
    8581   1.3411    
    8582   1.3381    
    8583   1.3352    
    8584   1.3322    
    8585   1.3293    
    8586   1.3263    
    8587   1.3234    
    8588   1.3206    
    8589   1.3191    
    8590   1.3279    
    8591  0.91570    
    8592  0.91718    
    8593  0.91745    
    8594  0.91518    
    8595  0.91274    
    8596  0.91060    
    8597  0.90850    
    8598  0.90641    
    8599  0.90431    
    8600  0.90223    
    8601  0.90014    
 
  ***** POST1 NODAL DEGREE OF FREEDOM LISTING *****                            
 
  LOAD STEP=     3  SUBSTEP=    17                                             
   TIME=    82.250      LOAD CASE=   0                                         
 
    NODE      TEMP  
    8602  0.89806    
    8603  0.89598    
    8604  0.89391    
    8605  0.89184    
    8606  0.88977    
    8607  0.88771    
    8608  0.88565    
    8609  0.88360    
    8610  0.88155    
    8611  0.87950    
    8612  0.87746    
    8613  0.87542    
    8614  0.87338    
    8615  0.87135    
    8616  0.86934    
    8617  0.86740    
    8618  0.86709    
    8619  0.87576    
    8620  0.55407    
    8621  0.55874    
    8622  0.56105    
    8623  0.55940    
    8624  0.55783    
    8625  0.55669    
    8626  0.55557    
    8627  0.55446    
    8628  0.55335    
    8629  0.55224    
    8630  0.55114    
    8631  0.55004    
    8632  0.54894    
    8633  0.54785    
    8634  0.54677    
    8635  0.54568    
    8636  0.54460    
    8637  0.54352    
    8638  0.54245    
    8639  0.54138    
    8640  0.54031    
 
  ***** POST1 NODAL DEGREE OF FREEDOM LISTING *****                            
 
  LOAD STEP=     3  SUBSTEP=    17                                             
   TIME=    82.250      LOAD CASE=   0                                         
 
    NODE      TEMP  
    8641  0.53925    
    8642  0.53819    
    8643  0.53714    
    8644  0.53609    
    8645  0.53505    
    8646  0.53409    
    8647  0.53497    
    8648  0.54375    
    8649  0.40206    
    8650  0.41122    
    8651  0.41577    
    8652  0.41449    
    8653  0.41380    
    8654  0.41366    
    8655  0.41354    
    8656  0.41341    
    8657  0.41330    
    8658  0.41318    
    8659  0.41307    
    8660  0.41296    
    8661  0.41286    
    8662  0.41276    
    8663  0.41266    
    8664  0.41257    
    8665  0.41248    
    8666  0.41239    
    8667  0.41231    
    8668  0.41223    
    8669  0.41216    
    8670  0.41208    
    8671  0.41202    
    8672  0.41195    
    8673  0.41189    
    8674  0.41185    
    8675  0.41187    
    8676  0.41381    
    8677  0.42322    
    8678  0.48595    
    8679  0.50148    
 
  ***** POST1 NODAL DEGREE OF FREEDOM LISTING *****                            
 
  LOAD STEP=     3  SUBSTEP=    17                                             
   TIME=    82.250      LOAD CASE=   0                                         
 
    NODE      TEMP  
    8680  0.50830    
    8681  0.50704    
    8682  0.50726    
    8683  0.50813    
    8684  0.50897    
    8685  0.50983    
    8686  0.51069    
    8687  0.51156    
    8688  0.51243    
    8689  0.51330    
    8690  0.51417    
    8691  0.51505    
    8692  0.51594    
    8693  0.51682    
    8694  0.51771    
    8695  0.51861    
    8696  0.51950    
    8697  0.52040    
    8698  0.52131    
    8699  0.52222    
    8700  0.52313    
    8701  0.52405    
    8702  0.52496    
    8703  0.52590    
    8704  0.52690    
    8705  0.52976    
    8706  0.54038    
    8707  0.77981    
    8708  0.80402    
    8709  0.81280    
    8710  0.81123    
    8711  0.81241    
    8712  0.81423    
    8713  0.81602    
    8714  0.81782    
    8715  0.81963    
    8716  0.82144    
    8717  0.82325    
    8718  0.82507    
 
  ***** POST1 NODAL DEGREE OF FREEDOM LISTING *****                            
 
  LOAD STEP=     3  SUBSTEP=    17                                             
   TIME=    82.250      LOAD CASE=   0                                         
 
    NODE      TEMP  
    8719  0.82689    
    8720  0.82871    
    8721  0.83054    
    8722  0.83238    
    8723  0.83421    
    8724  0.83605    
    8725  0.83790    
    8726  0.83975    
    8727  0.84160    
    8728  0.84346    
    8729  0.84532    
    8730  0.84718    
    8731  0.84905    
    8732  0.85093    
    8733  0.85289    
    8734  0.85648    
    8735  0.86880    
    8736   1.1948    
    8737   1.2293    
    8738   1.2394    
    8739   1.2373    
    8740   1.2394    
    8741   1.2421    
    8742   1.2447    
    8743   1.2474    
    8744   1.2500    
    8745   1.2527    
    8746   1.2553    
    8747   1.2580    
    8748   1.2607    
    8749   1.2633    
    8750   1.2660    
    8751   1.2687    
    8752   1.2714    
    8753   1.2741    
    8754   1.2768    
    8755   1.2795    
    8756   1.2822    
    8757   1.2849    
 
  ***** POST1 NODAL DEGREE OF FREEDOM LISTING *****                            
 
  LOAD STEP=     3  SUBSTEP=    17                                             
   TIME=    82.250      LOAD CASE=   0                                         
 
    NODE      TEMP  
    8758   1.2876    
    8759   1.2903    
    8760   1.2930    
    8761   1.2957    
    8762   1.2986    
    8763   1.3027    
    8764   1.3169    
    8765   1.5690    
    8766   1.6124    
    8767   1.6230    
    8768   1.6205    
    8769   1.6233    
    8770   1.6266    
    8771   1.6299    
    8772   1.6331    
    8773   1.6364    
    8774   1.6397    
    8775   1.6429    
    8776   1.6462    
    8777   1.6495    
    8778   1.6528    
    8779   1.6561    
    8780   1.6594    
    8781   1.6627    
    8782   1.6660    
    8783   1.6693    
    8784   1.6727    
    8785   1.6760    
    8786   1.6793    
    8787   1.6826    
    8788   1.6860    
    8789   1.6893    
    8790   1.6927    
    8791   1.6961    
    8792   1.7006    
    8793   1.7162    
   13699   1.6320    
   13700   1.4660    
   13701   1.0667    
 
  ***** POST1 NODAL DEGREE OF FREEDOM LISTING *****                            
 
  LOAD STEP=     3  SUBSTEP=    17                                             
   TIME=    82.250      LOAD CASE=   0                                         
 
    NODE      TEMP  
   13702  0.61787    
   13703  0.27950    
   13704  0.13793    
   13705  0.21767    
   13706  0.49478    
   13707  0.88626    
   13708   1.2395    
   13759   1.5161    
   13760   1.5076    
   13761   1.5099    
   13762   1.5131    
   13763   1.5164    
   13764   1.5197    
   13765   1.5230    
   13766   1.5263    
   13767   1.5297    
   13768   1.5330    
   13769   1.5363    
   13770   1.5397    
   13771   1.5430    
   13772   1.5464    
   13773   1.5497    
   13774   1.5531    
   13775   1.5564    
   13776   1.5598    
   13777   1.5631    
   13778   1.5665    
   13779   1.5699    
   13780   1.5733    
   13781   1.5767    
   13782   1.5800    
   13783   1.5834    
   13784   1.5868    
   13785   1.5903    
   13786   1.5945    
   13787   1.6093    
   13933   1.3583    
   13934   1.3498    
   13935   1.3518    
 
  ***** POST1 NODAL DEGREE OF FREEDOM LISTING *****                            
 
  LOAD STEP=     3  SUBSTEP=    17                                             
   TIME=    82.250      LOAD CASE=   0                                         
 
    NODE      TEMP  
   13936   1.3548    
   13937   1.3579    
   13938   1.3610    
   13939   1.3641    
   13940   1.3672    
   13941   1.3703    
   13942   1.3735    
   13943   1.3766    
   13944   1.3797    
   13945   1.3828    
   13946   1.3860    
   13947   1.3891    
   13948   1.3923    
   13949   1.3954    
   13950   1.3986    
   13951   1.4017    
   13952   1.4049    
   13953   1.4080    
   13954   1.4112    
   13955   1.4144    
   13956   1.4176    
   13957   1.4207    
   13958   1.4239    
   13959   1.4272    
   13960   1.4311    
   13961   1.4451    
   13962  0.97989    
   13963  0.97167    
   13964  0.97289    
   13965  0.97533    
   13966  0.97785    
   13967  0.98038    
   13968  0.98291    
   13969  0.98545    
   13970  0.98800    
   13971  0.99054    
   13972  0.99310    
   13973  0.99565    
   13974  0.99821    
 
  ***** POST1 NODAL DEGREE OF FREEDOM LISTING *****                            
 
  LOAD STEP=     3  SUBSTEP=    17                                             
   TIME=    82.250      LOAD CASE=   0                                         
 
    NODE      TEMP  
   13975   1.0008    
   13976   1.0033    
   13977   1.0059    
   13978   1.0085    
   13979   1.0111    
   13980   1.0136    
   13981   1.0162    
   13982   1.0188    
   13983   1.0214    
   13984   1.0240    
   13985   1.0266    
   13986   1.0292    
   13987   1.0318    
   13988   1.0345    
   13989   1.0380    
   13990   1.0500    
   13991  0.55866    
   13992  0.55066    
   13993  0.55084    
   13994  0.55251    
   13995  0.55424    
   13996  0.55599    
   13997  0.55774    
   13998  0.55949    
   13999  0.56125    
   14000  0.56302    
   14001  0.56478    
   14002  0.56655    
   14003  0.56832    
   14004  0.57010    
   14005  0.57188    
   14006  0.57367    
   14007  0.57545    
   14008  0.57725    
   14009  0.57904    
   14010  0.58084    
   14011  0.58264    
   14012  0.58445    
   14013  0.58626    
 
  ***** POST1 NODAL DEGREE OF FREEDOM LISTING *****                            
 
  LOAD STEP=     3  SUBSTEP=    17                                             
   TIME=    82.250      LOAD CASE=   0                                         
 
    NODE      TEMP  
   14014  0.58807    
   14015  0.58988    
   14016  0.59172    
   14017  0.59356    
   14018  0.59636    
   14019  0.60596    
   14020  0.24997    
   14021  0.24190    
   14022  0.24102    
   14023  0.24182    
   14024  0.24268    
   14025  0.24355    
   14026  0.24443    
   14027  0.24532    
   14028  0.24620    
   14029  0.24709    
   14030  0.24799    
   14031  0.24888    
   14032  0.24978    
   14033  0.25068    
   14034  0.25159    
   14035  0.25250    
   14036  0.25341    
   14037  0.25433    
   14038  0.25525    
   14039  0.25617    
   14040  0.25710    
   14041  0.25803    
   14042  0.25896    
   14043  0.25990    
   14044  0.26084    
   14045  0.26179    
   14046  0.26276    
   14047  0.26472    
   14048  0.27172    
   14049  0.13800    
   14050  0.12938    
   14051  0.12753    
   14052  0.12743    
 
  ***** POST1 NODAL DEGREE OF FREEDOM LISTING *****                            
 
  LOAD STEP=     3  SUBSTEP=    17                                             
   TIME=    82.250      LOAD CASE=   0                                         
 
    NODE      TEMP  
   14053  0.12739    
   14054  0.12736    
   14055  0.12734    
   14056  0.12733    
   14057  0.12731    
   14058  0.12730    
   14059  0.12729    
   14060  0.12729    
   14061  0.12729    
   14062  0.12729    
   14063  0.12729    
   14064  0.12730    
   14065  0.12731    
   14066  0.12733    
   14067  0.12734    
   14068  0.12737    
   14069  0.12739    
   14070  0.12742    
   14071  0.12745    
   14072  0.12748    
   14073  0.12752    
   14074  0.12757    
   14075  0.12765    
   14076  0.12865    
   14077  0.13321    
   14078  0.24681    
   14079  0.23706    
   14080  0.23437    
   14081  0.23337    
   14082  0.23242    
   14083  0.23148    
   14084  0.23055    
   14085  0.22963    
   14086  0.22871    
   14087  0.22779    
   14088  0.22687    
   14089  0.22596    
   14090  0.22505    
   14091  0.22414    
 
  ***** POST1 NODAL DEGREE OF FREEDOM LISTING *****                            
 
  LOAD STEP=     3  SUBSTEP=    17                                             
   TIME=    82.250      LOAD CASE=   0                                         
 
    NODE      TEMP  
   14092  0.22324    
   14093  0.22234    
   14094  0.22144    
   14095  0.22055    
   14096  0.21966    
   14097  0.21878    
   14098  0.21789    
   14099  0.21701    
   14100  0.21614    
   14101  0.21526    
   14102  0.21439    
   14103  0.21353    
   14104  0.21272    
   14105  0.21269    
   14106  0.21510    
   14107  0.55214    
   14108  0.54078    
   14109  0.53739    
   14110  0.53548    
   14111  0.53363    
   14112  0.53180    
   14113  0.52997    
   14114  0.52815    
   14115  0.52632    
   14116  0.52451    
   14117  0.52269    
   14118  0.52088    
   14119  0.51908    
   14120  0.51727    
   14121  0.51547    
   14122  0.51368    
   14123  0.51188    
   14124  0.51009    
   14125  0.50831    
   14126  0.50652    
   14127  0.50474    
   14128  0.50297    
   14129  0.50120    
   14130  0.49943    
 
  ***** POST1 NODAL DEGREE OF FREEDOM LISTING *****                            
 
  LOAD STEP=     3  SUBSTEP=    17                                             
   TIME=    82.250      LOAD CASE=   0                                         
 
    NODE      TEMP  
   14131  0.49766    
   14132  0.49590    
   14133  0.49420    
   14134  0.49312    
   14135  0.49371    
   14136  0.96952    
   14137  0.95642    
   14138  0.95244    
   14139  0.94969    
   14140  0.94700    
   14141  0.94434    
   14142  0.94167    
   14143  0.93901    
   14144  0.93635    
   14145  0.93370    
   14146  0.93105    
   14147  0.92840    
   14148  0.92576    
   14149  0.92312    
   14150  0.92048    
   14151  0.91785    
   14152  0.91523    
   14153  0.91260    
   14154  0.90998    
   14155  0.90736    
   14156  0.90475    
   14157  0.90214    
   14158  0.89954    
   14159  0.89694    
   14160  0.89434    
   14161  0.89174    
   14162  0.88921    
   14163  0.88713    
   14164  0.88623    
   14165   1.3432    
   14166   1.3287    
   14167   1.3243    
   14168   1.3209    
   14169   1.3175    
 
  ***** POST1 NODAL DEGREE OF FREEDOM LISTING *****                            
 
  LOAD STEP=     3  SUBSTEP=    17                                             
   TIME=    82.250      LOAD CASE=   0                                         
 
    NODE      TEMP  
   14170   1.3142    
   14171   1.3108    
   14172   1.3075    
   14173   1.3042    
   14174   1.3009    
   14175   1.2976    
   14176   1.2942    
   14177   1.2909    
   14178   1.2876    
   14179   1.2843    
   14180   1.2810    
   14181   1.2777    
   14182   1.2744    
   14183   1.2711    
   14184   1.2679    
   14185   1.2646    
   14186   1.2613    
   14187   1.2580    
   14188   1.2548    
   14189   1.2515    
   14190   1.2483    
   14191   1.2450    
   14192   1.2422    
   14193   1.2401    
   19099   1.5004    
   19100   1.1092    
   19101  0.67384    
   19102  0.35478    
   19103  0.23898    
   19104  0.35121    
   19105  0.66621    
   19106   1.0964    
   19107   1.4800    
   19153   1.5713    
   19154   1.5569    
   19155   1.5530    
   19156   1.5497    
   19157   1.5464    
   19158   1.5431    
 
  ***** POST1 NODAL DEGREE OF FREEDOM LISTING *****                            
 
  LOAD STEP=     3  SUBSTEP=    17                                             
   TIME=    82.250      LOAD CASE=   0                                         
 
    NODE      TEMP  
   19159   1.5398    
   19160   1.5366    
   19161   1.5333    
   19162   1.5301    
   19163   1.5268    
   19164   1.5236    
   19165   1.5203    
   19166   1.5171    
   19167   1.5138    
   19168   1.5106    
   19169   1.5074    
   19170   1.5042    
   19171   1.5010    
   19172   1.4977    
   19173   1.4945    
   19174   1.4913    
   19175   1.4881    
   19176   1.4849    
   19177   1.4817    
   19178   1.4786    
   19179   1.4755    
   19180   1.4734    
   19181   1.4821    
   19182   1.1674    
   19183   1.1542    
   19184   1.1504    
   19185   1.1477    
   19186   1.1450    
   19187   1.1423    
   19188   1.1396    
   19189   1.1369    
   19190   1.1343    
   19191   1.1316    
   19192   1.1289    
   19193   1.1263    
   19194   1.1236    
   19195   1.1209    
   19196   1.1183    
   19197   1.1156    
 
  ***** POST1 NODAL DEGREE OF FREEDOM LISTING *****                            
 
  LOAD STEP=     3  SUBSTEP=    17                                             
   TIME=    82.250      LOAD CASE=   0                                         
 
    NODE      TEMP  
   19198   1.1130    
   19199   1.1104    
   19200   1.1077    
   19201   1.1051    
   19202   1.1025    
   19203   1.0999    
   19204   1.0972    
   19205   1.0946    
   19206   1.0920    
   19207   1.0894    
   19208   1.0869    
   19209   1.0856    
   19210   1.0941    
   19211  0.71323    
   19212  0.70158    
   19213  0.69825    
   19214  0.69634    
   19215  0.69443    
   19216  0.69254    
   19217  0.69066    
   19218  0.68879    
   19219  0.68692    
   19220  0.68505    
   19221  0.68319    
   19222  0.68133    
   19223  0.67947    
   19224  0.67762    
   19225  0.67577    
   19226  0.67392    
   19227  0.67208    
   19228  0.67024    
   19229  0.66841    
   19230  0.66658    
   19231  0.66475    
   19232  0.66293    
   19233  0.66111    
   19234  0.65929    
   19235  0.65748    
   19236  0.65569    
 
  ***** POST1 NODAL DEGREE OF FREEDOM LISTING *****                            
 
  LOAD STEP=     3  SUBSTEP=    17                                             
   TIME=    82.250      LOAD CASE=   0                                         
 
    NODE      TEMP  
   19237  0.65395    
   19238  0.65375    
   19239  0.66198    
   19240  0.37163    
   19241  0.36159    
   19242  0.35888    
   19243  0.35785    
   19244  0.35684    
   19245  0.35585    
   19246  0.35486    
   19247  0.35388    
   19248  0.35290    
   19249  0.35192    
   19250  0.35095    
   19251  0.34998    
   19252  0.34901    
   19253  0.34805    
   19254  0.34709    
   19255  0.34613    
   19256  0.34518    
   19257  0.34423    
   19258  0.34328    
   19259  0.34234    
   19260  0.34140    
   19261  0.34047    
   19262  0.33953    
   19263  0.33861    
   19264  0.33768    
   19265  0.33677    
   19266  0.33592    
   19267  0.33680    
   19268  0.34508    
   19269  0.23093    
   19270  0.22206    
   19271  0.22017    
   19272  0.22004    
   19273  0.21994    
   19274  0.21986    
   19275  0.21979    
 
  ***** POST1 NODAL DEGREE OF FREEDOM LISTING *****                            
 
  LOAD STEP=     3  SUBSTEP=    17                                             
   TIME=    82.250      LOAD CASE=   0                                         
 
    NODE      TEMP  
   19276  0.21972    
   19277  0.21965    
   19278  0.21958    
   19279  0.21952    
   19280  0.21947    
   19281  0.21941    
   19282  0.21936    
   19283  0.21931    
   19284  0.21927    
   19285  0.21923    
   19286  0.21919    
   19287  0.21916    
   19288  0.21913    
   19289  0.21910    
   19290  0.21907    
   19291  0.21905    
   19292  0.21904    
   19293  0.21902    
   19294  0.21902    
   19295  0.21908    
   19296  0.22093    
   19297  0.22977    
   19298  0.31647    
   19299  0.30821    
   19300  0.30727    
   19301  0.30805    
   19302  0.30886    
   19303  0.30969    
   19304  0.31053    
   19305  0.31137    
   19306  0.31221    
   19307  0.31306    
   19308  0.31391    
   19309  0.31476    
   19310  0.31561    
   19311  0.31647    
   19312  0.31734    
   19313  0.31820    
   19314  0.31907    
 
  ***** POST1 NODAL DEGREE OF FREEDOM LISTING *****                            
 
  LOAD STEP=     3  SUBSTEP=    17                                             
   TIME=    82.250      LOAD CASE=   0                                         
 
    NODE      TEMP  
   19315  0.31995    
   19316  0.32082    
   19317  0.32170    
   19318  0.32259    
   19319  0.32347    
   19320  0.32436    
   19321  0.32526    
   19322  0.32616    
   19323  0.32707    
   19324  0.32803    
   19325  0.33071    
   19326  0.34067    
   19327  0.60379    
   19328  0.59565    
   19329  0.59578    
   19330  0.59743    
   19331  0.59913    
   19332  0.60084    
   19333  0.60256    
   19334  0.60428    
   19335  0.60601    
   19336  0.60774    
   19337  0.60948    
   19338  0.61121    
   19339  0.61295    
   19340  0.61470    
   19341  0.61645    
   19342  0.61820    
   19343  0.61996    
   19344  0.62171    
   19345  0.62348    
   19346  0.62524    
   19347  0.62701    
   19348  0.62879    
   19349  0.63057    
   19350  0.63235    
   19351  0.63413    
   19352  0.63593    
   19353  0.63778    
 
  ***** POST1 NODAL DEGREE OF FREEDOM LISTING *****                            
 
  LOAD STEP=     3  SUBSTEP=    17                                             
   TIME=    82.250      LOAD CASE=   0                                         
 
    NODE      TEMP  
   19354  0.64113    
   19355  0.65267    
   19356   1.0077    
   19357  0.99937    
   19358   1.0006    
   19359   1.0030    
   19360   1.0055    
   19361   1.0080    
   19362   1.0105    
   19363   1.0130    
   19364   1.0155    
   19365   1.0181    
   19366   1.0206    
   19367   1.0231    
   19368   1.0257    
   19369   1.0282    
   19370   1.0308    
   19371   1.0333    
   19372   1.0359    
   19373   1.0384    
   19374   1.0410    
   19375   1.0435    
   19376   1.0461    
   19377   1.0487    
   19378   1.0513    
   19379   1.0538    
   19380   1.0564    
   19381   1.0590    
   19382   1.0617    
   19383   1.0655    
   19384   1.0788    
   19385   1.3715    
   19386   1.3630    
   19387   1.3650    
   19388   1.3680    
   19389   1.3710    
   19390   1.3741    
   19391   1.3772    
   19392   1.3803    
                           
 
  LOAD STEP=     3  SUBSTEP=    17                                             
   TIME=    82.250      LOAD CASE=   0                                         
 
    NODE      TEMP  
   19393   1.3834    
   19394   1.3865    
   19395   1.3896    
   19396   1.3928    
   19397   1.3959    
   19398   1.3990    
   19399   1.4021    
   19400   1.4053    
   19401   1.4084    
   19402   1.4115    
   19403   1.4147    
   19404   1.4178    
   19405   1.4210    
   19406   1.4241    
   19407   1.4273    
   19408   1.4305    
   19409   1.4336    
   19410   1.4368    
   19411   1.4401    
   19412   1.4442    
   19413   1.4587    

 
