# Supplementary material for: Thermal Analyses and Responses of Bridge Deck Hydronic Snow Melting System
Source: Hindawi journal article supplement (doi:10.1155/2019/8172494), 2019-01-01
Supplement: f1 [file 8172494.f1.zip › 8172494.f1/non-insulated bottom/spacing of 30mm, depth of 11cm.txt]

/PREP7  
*SET,pi,acos(-1)
*SET,d,0.02
*SET,L,0.2 
*SET,dens,1000  

*SET,carea,pi*(d**2)/4  

*SET,width,0.3
*SET,high,0.11 
*SET,high1,0.21


*SET,T1,-5  
*SET,T2,15  

ET,1,FLUID116   
!*  
KEYOPT,1,1,1
KEYOPT,1,2,2
KEYOPT,1,4,1
KEYOPT,1,5,0
!*  
ET,2,SOLID70

ET,3,SURF152
KEYOPT,3,1,0
KEYOPT,3,2,0
KEYOPT,3,3,0
KEYOPT,3,4,1
KEYOPT,3,5,0
KEYOPT,3,6,0
KEYOPT,3,7,0
KEYOPT,3,8,2
KEYOPT,3,9,0

ET,4,PLANE55

R,1,d,carea,1   
RMORE,pi*d*L/2,pi*d*L/2,0,0.023,0.8,0.3 
R,3, , , , , ,  
MP,KXX,1,2.16   

MP,C,1,4.187
 
MP,DENS,1,1000 
 
MP,VISC,1,3.96  
  
MP,KXX,2,9.66 
 
MP,C,2,0.966
 
MP,DENS,2,2450 


MP,KXX,4,5.54  
 
MP,C,4,1.68
 
MP,DENS,4,2100 


RECTNG,0,5*width,0,high1,
WPSTYLE,,,,,,,,1
wpoff,width/2,high1-high,0  
wpro,,90.000000,
ASBW,       1   
wpoff,0,0,-0.06
ASBW,all   
wpro,,,90.000000
aSBW,all  
*do,i,1,4
wpoff,0,0,width 
aSBW,all
*enddo
WPSTYLE,,,,,,,,0

TYPE,   4   
MAT,       2
REAL,       3    


LESIZE,2, , ,5, , , , ,1  
LESIZE,4, , ,5, , , , ,1  
LESIZE,11, , ,6, , , , ,1 
LESIZE,12, , ,6, , , , ,1   

LESIZE,5, , ,6,0.5, , , ,1
LESIZE,6, , ,6,0.5, , , ,1 
LESIZE,18, , ,6,0.5, , , ,1 
*do,i,23,44,7
LESIZE,i, , ,6,0.5, , , ,1 
*enddo
LESIZE,17, , ,5, , , , ,1 
LESIZE,43, , ,5, , , , ,1 

LESIZE,28, , ,10, , , , ,1 
LESIZE,35, , ,10, , , , ,1 
LESIZE,42, , ,10, , , , ,1 
LESIZE,49, , ,10, , , , ,1

MSHAPE,0,2D 
MSHKEY,1
AMESH,all 
TYPE,   2   
MAT,       2
REAL,       3   
ESYS,       0   
ESIZE,0,30, 
VEXT,all, , ,0,0,6,,,, 

NSEL,S,LOC,Y,0.17,0.21  
ESLN,S  
EMODIF,all,MAT,4,  
allsel,all


TYPE,   3   
MAT,       4
REAL,       3   
ESYS,       0  
NSEL,S,LOC,Y,0.21    
ESURF,0    
ALLSEL,ALL 
TYPE,   3   
MAT,       2
REAL,       3   
ESYS,       0  
NSEL,s,LOC,Y,0   
ESURF,0    
ALLSEL,ALL 

TYPE,   1  
MAT,       1
REAL,       1   
ESYS,       0   
NSEL,S,LOC,Y,high1-high 
NSEL,R,LOC,X,0.5*width,4.5*width
NSEL,U,LOC,X,0.5*width+0.001,1.5*width-0.001
NSEL,U,LOC,X,1.5*width+0.001,2.5*width-0.001
NSEL,U,LOC,X,2.5*width+0.001,3.5*width-0.001 
NSEL,U,LOC,X,3.5*width+0.001,4.5*width-0.001 
NPLOT   

N,58000,0.5*width,high1-high,0,,,,  
N,58030,0.5*width,high1-high,6,,,,  
FILL,58000,58030,29, , ,1,1,1
 
N,58031,1.5*width,high1-high,6,,,,  
N,58061,1.5*width,high1-high,0,,,,  
FILL,58031,58061,29, , ,1,1,1

N,58062,2.5*width,high1-high,0,,,,  
N,58092,2.5*width,high1-high,6,,,,  
FILL,58062,58092,29, , ,1,1,1
 
N,58093,3.5*width,high1-high,6,,,,  
N,58123,3.5*width,high1-high,0,,,,  
FILL,58093,58123,29, , ,1,1,1

N,58124,4.5*width,high1-high,0,,,,  
N,58154,4.5*width,high1-high,6,,,,  
FILL,58124,58154,29, , ,1,1,1


e,58000,58001,79,3208
*do,i,58001,58028
e,i,i+1,i-54793,i-54792
*enddo
e,58029,58030,3236,3085
e,58030,58031,3085,10109
e,58031,58032,10109,10226
*do,i,58032,58059
e,i,i+1,68258-i,68257-i
*enddo
e,58060,58061,10198,317
e,58061,58062,317,497
e,58062,58063,497,15598
*do,i,58063,58090
e,i,i+1,i-42465,i-42464
*enddo
e,58091,58092,15626,15509
e,58092,58093,15509,20729
e,58093,58094,20729,20846
*do,i,58094,58121
e,i,i+1,78940-i,78939-i
*enddo
e,58122,58123,20818,671
e,58123,58124,671,127
e,58124,58125,127,4468
*do,i,58125,58152
e,i,i+1,i-53657,i-53656
*enddo
e,58153,58154,4496,4351

ALLSEL,ALL 
ESEL,S,TYPE,,4  
ACLEAR,all
ALLSEL,ALL 


FINISH 
/SOLU 
ESEL,S,TYPE,,2  
ESEL,A,TYPE,,3  
NSLE,S 
IC,all,TEMP,-2.5,  


*DEL,_FNCNAME   
*DEL,_FNCMTID   
*DEL,_FNCCSYS   
*SET,_FNCNAME,'hw'  
*SET,_FNCCSYS,0 
! /INPUT,temp3.func,,,1 
*DIM,%_FNCNAME%,TABLE,6,24,1,,,,%_FNCCSYS%  
!   
! Begin of equation: 2.5*(0.96*sin(PI*({TIME}-9)/12)+0.14*sin(PI*({TIME}-9)/6)) 
! -2.5  
*SET,%_FNCNAME%(0,0,1), 0.0, -999   
*SET,%_FNCNAME%(2,0,1), 0.0 
*SET,%_FNCNAME%(3,0,1), 0.0 
*SET,%_FNCNAME%(4,0,1), 0.0 
*SET,%_FNCNAME%(5,0,1), 0.0 
*SET,%_FNCNAME%(6,0,1), 0.0 
*SET,%_FNCNAME%(0,1,1), 1.0, -1, 0, 9, 0, 0, 1  
*SET,%_FNCNAME%(0,2,1), 0.0, -2, 0, 1, 1, 2, -1 
*SET,%_FNCNAME%(0,3,1),   0, -1, 0, 3.14159265358979310, 0, 0, -2   
*SET,%_FNCNAME%(0,4,1), 0.0, -3, 0, 1, -1, 3, -2
*SET,%_FNCNAME%(0,5,1), 0.0, -1, 0, 12, 0, 0, -3
*SET,%_FNCNAME%(0,6,1), 0.0, -2, 0, 1, -3, 4, -1
*SET,%_FNCNAME%(0,7,1), 0.0, -1, 9, 1, -2, 0, 0 
*SET,%_FNCNAME%(0,8,1), 0.0, -2, 0, 0.96, 0, 0, -1  
*SET,%_FNCNAME%(0,9,1), 0.0, -3, 0, 1, -2, 3, -1
*SET,%_FNCNAME%(0,10,1), 0.0, -1, 0, 9, 0, 0, 1 
*SET,%_FNCNAME%(0,11,1), 0.0, -2, 0, 1, 1, 2, -1
*SET,%_FNCNAME%(0,12,1), 0.0, -1, 0, 3.14159265358979310, 0, 0, -2  
*SET,%_FNCNAME%(0,13,1), 0.0, -4, 0, 1, -1, 3, -2   
*SET,%_FNCNAME%(0,14,1), 0.0, -1, 0, 6, 0, 0, -4
*SET,%_FNCNAME%(0,15,1), 0.0, -2, 0, 1, -4, 4, -1   
*SET,%_FNCNAME%(0,16,1), 0.0, -1, 9, 1, -2, 0, 0
*SET,%_FNCNAME%(0,17,1), 0.0, -2, 0, 0.14, 0, 0, -1 
*SET,%_FNCNAME%(0,18,1), 0.0, -4, 0, 1, -2, 3, -1   
*SET,%_FNCNAME%(0,19,1), 0.0, -1, 0, 1, -3, 1, -4   
*SET,%_FNCNAME%(0,20,1), 0.0, -2, 0, 2.5, 0, 0, -1  
*SET,%_FNCNAME%(0,21,1), 0.0, -3, 0, 1, -2, 3, -1   
*SET,%_FNCNAME%(0,22,1), 0.0, -1, 0, 2.5, 0, 0, -3  
*SET,%_FNCNAME%(0,23,1), 0.0, -2, 0, 1, -3, 2, -1   
*SET,%_FNCNAME%(0,24,1), 0.0, 99, 0, 1, -2, 0, 0
! End of equation: 2.5*(0.96*sin(PI*({TIME}-9)/12)+0.14*sin(PI*({TIME}-9)/6))-2 
! .5
!-->


ESEL,S,TYPE,,3  
SFE,all,1,CONV, ,26.3   
SFE,all,1,CONV,2, %HW% 

ALLSEL,ALL 


ASEL,S,LOC,X,0  
ASEL,A,LOC,X,5*width

ASEL,A,LOC,Z,0  
ASEL,A,LOC,Z,6 
NSLA,S,1
SF,all,HFLUX,0 
ALLSEL,ALL 


ANTYPE,4
DELTIM,2,0,0
OUTRES,ERASE
OUTRES,ALL,1
KBC,0.0 
TIME,78
TIMINT,1
TOFFST,273, 

solve


DELTIM,0.02,0,0  
TIME,78.02
d,58000,temp,T2 
esel,s,ename,,fluid116  
sfe,all,,hflux,,2160*carea*dens 
ALLSEL,ALL  
solve


DELTIM,0.25,0,0  
TIME,82.25
solve


D,all, , %HW% , , , ,TEMP, , , , , 
NSEL,S,LOC,Y,0.21   
NSEL,R,LOC,Z,6  
