# Supplementary material for: Thermal Analyses and Responses of Bridge Deck Hydronic Snow Melting System
Source: Hindawi journal article supplement (doi:10.1155/2019/8172494), 2019-01-01
Supplement: f1 [file 8172494.f1.zip › 8172494.f1/non-insulated bottom/with embedded pipes.txt]

 PRINT TEMP NODAL SOLUTION PER NODE
 
  ***** POST1 NODAL DEGREE OF FREEDOM LISTING *****                            
 
  LOAD STEP=     3  SUBSTEP=    17                                             
   TIME=    82.250      LOAD CASE=   0                                         
 
    NODE      TEMP  
       1 -0.18543    
       7   1.2369    
       8 -0.70579E-01
       9  0.24902    
      10  0.68583    
      11   1.0773    
      37  0.17360    
      38   1.7213    
      39  0.29954    
      40  0.64960    
      41   1.1269    
      42   1.5524    
     187   1.4688    
     188   1.4830    
     189   1.2976    
     190  0.88678    
     191  0.43079    
     192  0.99117E-01
     193 -0.17094E-01
     194  0.10779    
     195  0.44700    
     196  0.90785    
     197   1.3188    
     253   1.5379    
     254   1.0963    
     255  0.59985    
     256  0.22605    
     257  0.70855E-01
     258  0.16196    
     259  0.47337    
     260  0.91296    
     261   1.3101    
     427   1.2537    
     428   1.0891    
     429  0.69431    
     430  0.25520    
     431 -0.66059E-01
     432 -0.18216    
     433 -0.68269E-01
 
  ***** POST1 NODAL DEGREE OF FREEDOM LISTING *****                            
 
  LOAD STEP=     3  SUBSTEP=    17                                             
   TIME=    82.250      LOAD CASE=   0                                         
 
    NODE      TEMP  
     434  0.25058    
     435  0.68679    
     436   1.0778    
     607   1.3086    
     608  0.88638    
     609  0.41197    
     610  0.55775E-01
     611 -0.90590E-01
     612 -0.10825E-02
     613  0.29897    
     614  0.72109    
     615   1.1018    
     919 -0.28574    
     925   1.0972    
     926 -0.17467    
     927  0.13456    
     928  0.55770    
     929  0.93838    
     955 -0.19555    
     956 -0.20660    
     957 -0.21120    
     958 -0.21413    
     959 -0.21704    
     960 -0.21993    
     961 -0.22281    
     962 -0.22569    
     963 -0.22857    
     964 -0.23145    
     965 -0.23432    
     966 -0.23719    
     967 -0.24005    
     968 -0.24292    
     969 -0.24578    
     970 -0.24863    
     971 -0.25149    
     972 -0.25434    
     973 -0.25719    
     974 -0.26003    
     975 -0.26287    
 
  ***** POST1 NODAL DEGREE OF FREEDOM LISTING *****                            
 
  LOAD STEP=     3  SUBSTEP=    17                                             
   TIME=    82.250      LOAD CASE=   0                                         
 
    NODE      TEMP  
     976 -0.26571    
     977 -0.26855    
     978 -0.27138    
     979 -0.27421    
     980 -0.27703    
     981 -0.27984    
     982 -0.28256    
     983 -0.28481    
    1013   1.2139    
    1014   1.1985    
    1015   1.1939    
    1016   1.1900    
    1017   1.1862    
    1018   1.1825    
    1019   1.1787    
    1020   1.1750    
    1021   1.1712    
    1022   1.1675    
    1023   1.1638    
    1024   1.1600    
    1025   1.1563    
    1026   1.1526    
    1027   1.1488    
    1028   1.1451    
    1029   1.1414    
    1030   1.1377    
    1031   1.1340    
    1032   1.1303    
    1033   1.1266    
    1034   1.1229    
    1035   1.1192    
    1036   1.1155    
    1037   1.1118    
    1038   1.1082    
    1039   1.1045    
    1040   1.1011    
    1041   1.0983    
    1187 -0.81674E-01
    1188 -0.93120E-01
 
  ***** POST1 NODAL DEGREE OF FREEDOM LISTING *****                            
 
  LOAD STEP=     3  SUBSTEP=    17                                             
   TIME=    82.250      LOAD CASE=   0                                         
 
    NODE      TEMP  
    1189 -0.97741E-01
    1190 -0.10077    
    1191 -0.10377    
    1192 -0.10675    
    1193 -0.10972    
    1194 -0.11270    
    1195 -0.11566    
    1196 -0.11863    
    1197 -0.12159    
    1198 -0.12455    
    1199 -0.12751    
    1200 -0.13046    
    1201 -0.13342    
    1202 -0.13636    
    1203 -0.13931    
    1204 -0.14225    
    1205 -0.14518    
    1206 -0.14812    
    1207 -0.15105    
    1208 -0.15398    
    1209 -0.15690    
    1210 -0.15983    
    1211 -0.16274    
    1212 -0.16566    
    1213 -0.16855    
    1214 -0.17136    
    1215 -0.17370    
    1216  0.23515    
    1217  0.22263    
    1218  0.21794    
    1219  0.21466    
    1220  0.21142    
    1221  0.20819    
    1222  0.20497    
    1223  0.20175    
    1224  0.19853    
    1225  0.19532    
    1226  0.19211    
    1227  0.18890    
 
  ***** POST1 NODAL DEGREE OF FREEDOM LISTING *****                            
 
  LOAD STEP=     3  SUBSTEP=    17                                             
   TIME=    82.250      LOAD CASE=   0                                         
 
    NODE      TEMP  
    1228  0.18570    
    1229  0.18250    
    1230  0.17930    
    1231  0.17611    
    1232  0.17292    
    1233  0.16973    
    1234  0.16655    
    1235  0.16337    
    1236  0.16019    
    1237  0.15702    
    1238  0.15385    
    1239  0.15069    
    1240  0.14752    
    1241  0.14437    
    1242  0.14123    
    1243  0.13819    
    1244  0.13563    
    1245  0.66798    
    1246  0.65409    
    1247  0.64934    
    1248  0.64573    
    1249  0.64217    
    1250  0.63862    
    1251  0.63508    
    1252  0.63154    
    1253  0.62801    
    1254  0.62447    
    1255  0.62095    
    1256  0.61742    
    1257  0.61390    
    1258  0.61039    
    1259  0.60687    
    1260  0.60337    
    1261  0.59986    
    1262  0.59636    
    1263  0.59286    
    1264  0.58937    
    1265  0.58588    
    1266  0.58239    
 
  ***** POST1 NODAL DEGREE OF FREEDOM LISTING *****                            
 
  LOAD STEP=     3  SUBSTEP=    17                                             
   TIME=    82.250      LOAD CASE=   0                                         
 
    NODE      TEMP  
    1267  0.57891    
    1268  0.57543    
    1269  0.57195    
    1270  0.56848    
    1271  0.56504    
    1272  0.56170    
    1273  0.55888    
    1274   1.0558    
    1275   1.0408    
    1276   1.0360    
    1277   1.0322    
    1278   1.0284    
    1279   1.0246    
    1280   1.0208    
    1281   1.0170    
    1282   1.0133    
    1283   1.0095    
    1284   1.0057    
    1285   1.0020    
    1286  0.99821    
    1287  0.99446    
    1288  0.99071    
    1289  0.98697    
    1290  0.98323    
    1291  0.97950    
    1292  0.97577    
    1293  0.97204    
    1294  0.96832    
    1295  0.96460    
    1296  0.96088    
    1297  0.95717    
    1298  0.95346    
    1299  0.94976    
    1300  0.94610    
    1301  0.94257    
    1302  0.93961    
    1999  0.10223    
    2000   1.6387    
    2001  0.22650    
 
  ***** POST1 NODAL DEGREE OF FREEDOM LISTING *****                            
 
  LOAD STEP=     3  SUBSTEP=    17                                             
   TIME=    82.250      LOAD CASE=   0                                         
 
    NODE      TEMP  
    2002  0.57214    
    2003   1.0441    
    2004   1.4668    
    2035  0.17217    
    2036  0.16923    
    2037  0.16603    
    2038  0.16278    
    2039  0.15950    
    2040  0.15622    
    2041  0.15295    
    2042  0.14968    
    2043  0.14641    
    2044  0.14315    
    2045  0.13989    
    2046  0.13664    
    2047  0.13339    
    2048  0.13014    
    2049  0.12690    
    2050  0.12366    
    2051  0.12042    
    2052  0.11719    
    2053  0.11396    
    2054  0.11073    
    2055  0.10751    
    2056  0.10429    
    2057  0.10107    
    2058  0.97861E-01
    2059  0.94653E-01
    2060  0.91461E-01
    2061  0.88312E-01
    2062  0.87045E-01
    2063  0.93617E-01
    2093   1.7191    
    2094   1.7156    
    2095   1.7120    
    2096   1.7078    
    2097   1.7035    
    2098   1.6992    
    2099   1.6950    
 
  ***** POST1 NODAL DEGREE OF FREEDOM LISTING *****                            
 
  LOAD STEP=     3  SUBSTEP=    17                                             
   TIME=    82.250      LOAD CASE=   0                                         
 
    NODE      TEMP  
    2100   1.6908    
    2101   1.6866    
    2102   1.6824    
    2103   1.6782    
    2104   1.6740    
    2105   1.6698    
    2106   1.6656    
    2107   1.6614    
    2108   1.6572    
    2109   1.6531    
    2110   1.6489    
    2111   1.6447    
    2112   1.6406    
    2113   1.6364    
    2114   1.6322    
    2115   1.6281    
    2116   1.6240    
    2117   1.6198    
    2118   1.6157    
    2119   1.6116    
    2120   1.6085    
    2121   1.6175    
    2383  0.29803    
    2384  0.29499    
    2385  0.29170    
    2386  0.28835    
    2387  0.28497    
    2388  0.28159    
    2389  0.27822    
    2390  0.27485    
    2391  0.27148    
    2392  0.26812    
    2393  0.26477    
    2394  0.26141    
    2395  0.25806    
    2396  0.25472    
    2397  0.25137    
    2398  0.24803    
    2399  0.24470    
 
  ***** POST1 NODAL DEGREE OF FREEDOM LISTING *****                            
 
  LOAD STEP=     3  SUBSTEP=    17                                             
   TIME=    82.250      LOAD CASE=   0                                         
 
    NODE      TEMP  
    2400  0.24137    
    2401  0.23804    
    2402  0.23471    
    2403  0.23139    
    2404  0.22807    
    2405  0.22476    
    2406  0.22145    
    2407  0.21814    
    2408  0.21485    
    2409  0.21161    
    2410  0.21017    
    2411  0.21696    
    2412  0.64787    
    2413  0.64457    
    2414  0.64104    
    2415  0.63743    
    2416  0.63377    
    2417  0.63011    
    2418  0.62647    
    2419  0.62283    
    2420  0.61919    
    2421  0.61556    
    2422  0.61194    
    2423  0.60831    
    2424  0.60469    
    2425  0.60108    
    2426  0.59746    
    2427  0.59385    
    2428  0.59025    
    2429  0.58665    
    2430  0.58305    
    2431  0.57946    
    2432  0.57587    
    2433  0.57228    
    2434  0.56870    
    2435  0.56512    
    2436  0.56155    
    2437  0.55800    
    2438  0.55449    
 
  ***** POST1 NODAL DEGREE OF FREEDOM LISTING *****                            
 
  LOAD STEP=     3  SUBSTEP=    17                                             
   TIME=    82.250      LOAD CASE=   0                                         
 
    NODE      TEMP  
    2439  0.55257    
    2440  0.55993    
    2441   1.1248    
    2442   1.1212    
    2443   1.1174    
    2444   1.1135    
    2445   1.1095    
    2446   1.1055    
    2447   1.1015    
    2448   1.0975    
    2449   1.0935    
    2450   1.0895    
    2451   1.0855    
    2452   1.0816    
    2453   1.0776    
    2454   1.0736    
    2455   1.0697    
    2456   1.0657    
    2457   1.0618    
    2458   1.0578    
    2459   1.0539    
    2460   1.0500    
    2461   1.0460    
    2462   1.0421    
    2463   1.0382    
    2464   1.0342    
    2465   1.0303    
    2466   1.0264    
    2467   1.0226    
    2468   1.0200    
    2469   1.0281    
    2470   1.5502    
    2471   1.5464    
    2472   1.5425    
    2473   1.5383    
    2474   1.5340    
    2475   1.5297    
    2476   1.5255    
    2477   1.5212    
 
  ***** POST1 NODAL DEGREE OF FREEDOM LISTING *****                            
 
  LOAD STEP=     3  SUBSTEP=    17                                             
   TIME=    82.250      LOAD CASE=   0                                         
 
    NODE      TEMP  
    2478   1.5170    
    2479   1.5128    
    2480   1.5085    
    2481   1.5043    
    2482   1.5001    
    2483   1.4959    
    2484   1.4917    
    2485   1.4874    
    2486   1.4832    
    2487   1.4790    
    2488   1.4748    
    2489   1.4707    
    2490   1.4665    
    2491   1.4623    
    2492   1.4581    
    2493   1.4539    
    2494   1.4498    
    2495   1.4456    
    2496   1.4415    
    2497   1.4385    
    2498   1.4472    
    6499   1.6211    
    6500   1.3827    
    6501   1.4412    
    6502   1.0074    
    6503  0.52018    
    6504  0.15435    
    6505  0.39260E-02
    6506  0.95664E-01
    6507  0.40351    
    6508  0.83657    
    6509   1.2271    
    6565   1.4360    
    6566   1.4842    
    6567   1.4950    
    6568   1.4921    
    6569   1.4953    
    6570   1.4989    
    6571   1.5025    
 
  ***** POST1 NODAL DEGREE OF FREEDOM LISTING *****                            
 
  LOAD STEP=     3  SUBSTEP=    17                                             
   TIME=    82.250      LOAD CASE=   0                                         
 
    NODE      TEMP  
    6572   1.5061    
    6573   1.5097    
    6574   1.5133    
    6575   1.5169    
    6576   1.5205    
    6577   1.5241    
    6578   1.5277    
    6579   1.5313    
    6580   1.5349    
    6581   1.5385    
    6582   1.5422    
    6583   1.5458    
    6584   1.5494    
    6585   1.5531    
    6586   1.5567    
    6587   1.5604    
    6588   1.5640    
    6589   1.5677    
    6590   1.5714    
    6591   1.5751    
    6592   1.5798    
    6593   1.5961    
    6623   1.4592    
    6624   1.4445    
    6625   1.4408    
    6626   1.4372    
    6627   1.4336    
    6628   1.4300    
    6629   1.4264    
    6630   1.4229    
    6631   1.4193    
    6632   1.4158    
    6633   1.4123    
    6634   1.4087    
    6635   1.4052    
    6636   1.4017    
    6637   1.3981    
    6638   1.3946    
    6639   1.3911    
 
  ***** POST1 NODAL DEGREE OF FREEDOM LISTING *****                            
 
  LOAD STEP=     3  SUBSTEP=    17                                             
   TIME=    82.250      LOAD CASE=   0                                         
 
    NODE      TEMP  
    6640   1.3876    
    6641   1.3841    
    6642   1.3806    
    6643   1.3771    
    6644   1.3736    
    6645   1.3701    
    6646   1.3666    
    6647   1.3631    
    6648   1.3597    
    6649   1.3563    
    6650   1.3537    
    6651   1.3626    
    6913   1.2680    
    6914   1.3120    
    6915   1.3226    
    6916   1.3199    
    6917   1.3229    
    6918   1.3262    
    6919   1.3296    
    6920   1.3329    
    6921   1.3363    
    6922   1.3397    
    6923   1.3430    
    6924   1.3464    
    6925   1.3498    
    6926   1.3532    
    6927   1.3566    
    6928   1.3600    
    6929   1.3633    
    6930   1.3667    
    6931   1.3702    
    6932   1.3736    
    6933   1.3770    
    6934   1.3804    
    6935   1.3838    
    6936   1.3872    
    6937   1.3907    
    6938   1.3941    
    6939   1.3976    
 
  ***** POST1 NODAL DEGREE OF FREEDOM LISTING *****                            
 
  LOAD STEP=     3  SUBSTEP=    17                                             
   TIME=    82.250      LOAD CASE=   0                                         
 
    NODE      TEMP  
    6940   1.4022    
    6941   1.4179    
    6942  0.86477    
    6943  0.89887    
    6944  0.90868    
    6945  0.90650    
    6946  0.90872    
    6947  0.91150    
    6948  0.91422    
    6949  0.91697    
    6950  0.91971    
    6951  0.92246    
    6952  0.92522    
    6953  0.92798    
    6954  0.93074    
    6955  0.93351    
    6956  0.93628    
    6957  0.93905    
    6958  0.94183    
    6959  0.94462    
    6960  0.94740    
    6961  0.95020    
    6962  0.95299    
    6963  0.95579    
    6964  0.95859    
    6965  0.96140    
    6966  0.96421    
    6967  0.96705    
    6968  0.96993    
    6969  0.97406    
    6970  0.98828    
    6971  0.41650    
    6972  0.43923    
    6973  0.44752    
    6974  0.44590    
    6975  0.44719    
    6976  0.44912    
    6977  0.45100    
    6978  0.45291    
 
  ***** POST1 NODAL DEGREE OF FREEDOM LISTING *****                            
 
  LOAD STEP=     3  SUBSTEP=    17                                             
   TIME=    82.250      LOAD CASE=   0                                         
 
    NODE      TEMP  
    6979  0.45481    
    6980  0.45672    
    6981  0.45863    
    6982  0.46055    
    6983  0.46247    
    6984  0.46440    
    6985  0.46632    
    6986  0.46826    
    6987  0.47019    
    6988  0.47213    
    6989  0.47407    
    6990  0.47602    
    6991  0.47797    
    6992  0.47993    
    6993  0.48188    
    6994  0.48385    
    6995  0.48581    
    6996  0.48780    
    6997  0.48982    
    6998  0.49338    
    6999  0.50564    
    7000  0.89807E-01
    7001  0.10255    
    7002  0.10869    
    7003  0.10745    
    7004  0.10779    
    7005  0.10878    
    7006  0.10974    
    7007  0.11071    
    7008  0.11169    
    7009  0.11267    
    7010  0.11365    
    7011  0.11464    
    7012  0.11563    
    7013  0.11662    
    7014  0.11762    
    7015  0.11862    
    7016  0.11962    
    7017  0.12063    
 
  ***** POST1 NODAL DEGREE OF FREEDOM LISTING *****                            
 
  LOAD STEP=     3  SUBSTEP=    17                                             
   TIME=    82.250      LOAD CASE=   0                                         
 
    NODE      TEMP  
    7018  0.12164    
    7019  0.12265    
    7020  0.12367    
    7021  0.12469    
    7022  0.12572    
    7023  0.12675    
    7024  0.12778    
    7025  0.12883    
    7026  0.12992    
    7027  0.13273    
    7028  0.14319    
    7029 -0.24797E-01
    7030 -0.19929E-01
    7031 -0.16174E-01
    7032 -0.17378E-01
    7033 -0.17922E-01
    7034 -0.17911E-01
    7035 -0.17896E-01
    7036 -0.17875E-01
    7037 -0.17850E-01
    7038 -0.17823E-01
    7039 -0.17791E-01
    7040 -0.17757E-01
    7041 -0.17719E-01
    7042 -0.17677E-01
    7043 -0.17633E-01
    7044 -0.17584E-01
    7045 -0.17533E-01
    7046 -0.17478E-01
    7047 -0.17420E-01
    7048 -0.17358E-01
    7049 -0.17293E-01
    7050 -0.17224E-01
    7051 -0.17152E-01
    7052 -0.17077E-01
    7053 -0.16997E-01
    7054 -0.16903E-01
    7055 -0.16767E-01
    7056 -0.14839E-01
 
  ***** POST1 NODAL DEGREE OF FREEDOM LISTING *****                            
 
  LOAD STEP=     3  SUBSTEP=    17                                             
   TIME=    82.250      LOAD CASE=   0                                         
 
    NODE      TEMP  
    7057 -0.56855E-02
    7058  0.98788E-01
    7059  0.97458E-01
    7060  0.98944E-01
    7061  0.97442E-01
    7062  0.96053E-01
    7063  0.95095E-01
    7064  0.94162E-01
    7065  0.93232E-01
    7066  0.92305E-01
    7067  0.91382E-01
    7068  0.90463E-01
    7069  0.89547E-01
    7070  0.88634E-01
    7071  0.87725E-01
    7072  0.86820E-01
    7073  0.85917E-01
    7074  0.85019E-01
    7075  0.84124E-01
    7076  0.83232E-01
    7077  0.82344E-01
    7078  0.81459E-01
    7079  0.80577E-01
    7080  0.79700E-01
    7081  0.78825E-01
    7082  0.77955E-01
    7083  0.77101E-01
    7084  0.76288E-01
    7085  0.77188E-01
    7086  0.85678E-01
    7087  0.43445    
    7088  0.42810    
    7089  0.42764    
    7090  0.42557    
    7091  0.42337    
    7092  0.42148    
    7093  0.41962    
    7094  0.41776    
    7095  0.41590    
 
  ***** POST1 NODAL DEGREE OF FREEDOM LISTING *****                            
 
  LOAD STEP=     3  SUBSTEP=    17                                             
   TIME=    82.250      LOAD CASE=   0                                         
 
    NODE      TEMP  
    7096  0.41405    
    7097  0.41220    
    7098  0.41036    
    7099  0.40852    
    7100  0.40668    
    7101  0.40485    
    7102  0.40302    
    7103  0.40119    
    7104  0.39937    
    7105  0.39755    
    7106  0.39574    
    7107  0.39393    
    7108  0.39212    
    7109  0.39032    
    7110  0.38852    
    7111  0.38672    
    7112  0.38495    
    7113  0.38321    
    7114  0.38299    
    7115  0.39136    
    7116  0.89046    
    7117  0.88008    
    7118  0.87809    
    7119  0.87535    
    7120  0.87241    
    7121  0.86967    
    7122  0.86697    
    7123  0.86427    
    7124  0.86157    
    7125  0.85888    
    7126  0.85619    
    7127  0.85351    
    7128  0.85083    
    7129  0.84815    
    7130  0.84548    
    7131  0.84282    
    7132  0.84015    
    7133  0.83749    
    7134  0.83484    
 
  ***** POST1 NODAL DEGREE OF FREEDOM LISTING *****                            
 
  LOAD STEP=     3  SUBSTEP=    17                                             
   TIME=    82.250      LOAD CASE=   0                                         
 
    NODE      TEMP  
    7135  0.83219    
    7136  0.82954    
    7137  0.82689    
    7138  0.82426    
    7139  0.82162    
    7140  0.81899    
    7141  0.81638    
    7142  0.81382    
    7143  0.81248    
    7144  0.82105    
    7145   1.2970    
    7146   1.2837    
    7147   1.2806    
    7148   1.2773    
    7149   1.2738    
    7150   1.2705    
    7151   1.2672    
    7152   1.2638    
    7153   1.2605    
    7154   1.2572    
    7155   1.2539    
    7156   1.2506    
    7157   1.2473    
    7158   1.2440    
    7159   1.2407    
    7160   1.2375    
    7161   1.2342    
    7162   1.2309    
    7163   1.2276    
    7164   1.2244    
    7165   1.2211    
    7166   1.2178    
    7167   1.2146    
    7168   1.2113    
    7169   1.2081    
    7170   1.2049    
    7171   1.2017    
    7172   1.1995    
    7173   1.2083    
 
  ***** POST1 NODAL DEGREE OF FREEDOM LISTING *****                            
 
  LOAD STEP=     3  SUBSTEP=    17                                             
   TIME=    82.250      LOAD CASE=   0                                         
 
    NODE      TEMP  
    8479   1.4663    
    8480   1.0431    
    8481  0.57044    
    8482  0.22400    
    8483  0.98705E-01
    8484  0.22165    
    8485  0.56553    
    8486   1.0351    
    8487   1.4543    
    8533   1.5359    
    8534   1.5334    
    8535   1.5306    
    8536   1.5268    
    8537   1.5228    
    8538   1.5190    
    8539   1.5152    
    8540   1.5114    
    8541   1.5076    
    8542   1.5038    
    8543   1.5000    
    8544   1.4962    
    8545   1.4925    
    8546   1.4887    
    8547   1.4849    
    8548   1.4811    
    8549   1.4774    
    8550   1.4736    
    8551   1.4699    
    8552   1.4661    
    8553   1.4624    
    8554   1.4586    
    8555   1.4549    
    8556   1.4512    
    8557   1.4474    
    8558   1.4437    
    8559   1.4401    
    8560   1.4375    
    8561   1.4465    
    8562   1.0947    
 
  ***** POST1 NODAL DEGREE OF FREEDOM LISTING *****                            
 
  LOAD STEP=     3  SUBSTEP=    17                                             
   TIME=    82.250      LOAD CASE=   0                                         
 
    NODE      TEMP  
    8563   1.0938    
    8564   1.0923    
    8565   1.0892    
    8566   1.0859    
    8567   1.0828    
    8568   1.0798    
    8569   1.0767    
    8570   1.0737    
    8571   1.0706    
    8572   1.0676    
    8573   1.0645    
    8574   1.0615    
    8575   1.0585    
    8576   1.0554    
    8577   1.0524    
    8578   1.0494    
    8579   1.0464    
    8580   1.0434    
    8581   1.0404    
    8582   1.0374    
    8583   1.0344    
    8584   1.0314    
    8585   1.0284    
    8586   1.0254    
    8587   1.0224    
    8588   1.0195    
    8589   1.0179    
    8590   1.0267    
    8591  0.59854    
    8592  0.59993    
    8593  0.60012    
    8594  0.59779    
    8595  0.59535    
    8596  0.59319    
    8597  0.59107    
    8598  0.58895    
    8599  0.58683    
    8600  0.58472    
    8601  0.58261    
 
  ***** POST1 NODAL DEGREE OF FREEDOM LISTING *****                            
 
  LOAD STEP=     3  SUBSTEP=    17                                             
   TIME=    82.250      LOAD CASE=   0                                         
 
    NODE      TEMP  
    8602  0.58051    
    8603  0.57841    
    8604  0.57631    
    8605  0.57422    
    8606  0.57213    
    8607  0.57004    
    8608  0.56796    
    8609  0.56588    
    8610  0.56381    
    8611  0.56174    
    8612  0.55967    
    8613  0.55761    
    8614  0.55555    
    8615  0.55350    
    8616  0.55146    
    8617  0.54947    
    8618  0.54905    
    8619  0.55769    
    8620  0.22444    
    8621  0.22906    
    8622  0.23130    
    8623  0.22961    
    8624  0.22804    
    8625  0.22689    
    8626  0.22577    
    8627  0.22465    
    8628  0.22353    
    8629  0.22242    
    8630  0.22131    
    8631  0.22020    
    8632  0.21910    
    8633  0.21800    
    8634  0.21691    
    8635  0.21582    
    8636  0.21473    
    8637  0.21365    
    8638  0.21257    
    8639  0.21149    
    8640  0.21042    
 
  ***** POST1 NODAL DEGREE OF FREEDOM LISTING *****                            
 
  LOAD STEP=     3  SUBSTEP=    17                                             
   TIME=    82.250      LOAD CASE=   0                                         
 
    NODE      TEMP  
    8641  0.20935    
    8642  0.20828    
    8643  0.20722    
    8644  0.20616    
    8645  0.20512    
    8646  0.20412    
    8647  0.20489    
    8648  0.21361    
    8649  0.67788E-01
    8650  0.76969E-01
    8651  0.81475E-01
    8652  0.80152E-01
    8653  0.79477E-01
    8654  0.79352E-01
    8655  0.79232E-01
    8656  0.79116E-01
    8657  0.79005E-01
    8658  0.78897E-01
    8659  0.78792E-01
    8660  0.78691E-01
    8661  0.78593E-01
    8662  0.78499E-01
    8663  0.78408E-01
    8664  0.78321E-01
    8665  0.78237E-01
    8666  0.78157E-01
    8667  0.78080E-01
    8668  0.78007E-01
    8669  0.77937E-01
    8670  0.77870E-01
    8671  0.77808E-01
    8672  0.77748E-01
    8673  0.77693E-01
    8674  0.77653E-01
    8675  0.77656E-01
    8676  0.79509E-01
    8677  0.88836E-01
    8678  0.15546    
    8679  0.17118    
 
  ***** POST1 NODAL DEGREE OF FREEDOM LISTING *****                            
 
  LOAD STEP=     3  SUBSTEP=    17                                             
   TIME=    82.250      LOAD CASE=   0                                         
 
    NODE      TEMP  
    8680  0.17798    
    8681  0.17667    
    8682  0.17692    
    8683  0.17781    
    8684  0.17868    
    8685  0.17955    
    8686  0.18044    
    8687  0.18132    
    8688  0.18221    
    8689  0.18310    
    8690  0.18400    
    8691  0.18489    
    8692  0.18580    
    8693  0.18670    
    8694  0.18761    
    8695  0.18853    
    8696  0.18944    
    8697  0.19036    
    8698  0.19129    
    8699  0.19221    
    8700  0.19314    
    8701  0.19408    
    8702  0.19502    
    8703  0.19597    
    8704  0.19697    
    8705  0.19974    
    8706  0.21032    
    8707  0.46073    
    8708  0.48538    
    8709  0.49419    
    8710  0.49254    
    8711  0.49376    
    8712  0.49563    
    8713  0.49745    
    8714  0.49929    
    8715  0.50114    
    8716  0.50298    
    8717  0.50483    
    8718  0.50669    
 
  ***** POST1 NODAL DEGREE OF FREEDOM LISTING *****                            
 
  LOAD STEP=     3  SUBSTEP=    17                                             
   TIME=    82.250      LOAD CASE=   0                                         
 
    NODE      TEMP  
    8719  0.50854    
    8720  0.51040    
    8721  0.51227    
    8722  0.51414    
    8723  0.51601    
    8724  0.51789    
    8725  0.51977    
    8726  0.52165    
    8727  0.52354    
    8728  0.52543    
    8729  0.52733    
    8730  0.52923    
    8731  0.53113    
    8732  0.53305    
    8733  0.53502    
    8734  0.53855    
    8735  0.55090    
    8736  0.89185    
    8737  0.92709    
    8738  0.93725    
    8739  0.93506    
    8740  0.93724    
    8741  0.93998    
    8742  0.94266    
    8743  0.94537    
    8744  0.94808    
    8745  0.95079    
    8746  0.95351    
    8747  0.95623    
    8748  0.95895    
    8749  0.96168    
    8750  0.96441    
    8751  0.96715    
    8752  0.96989    
    8753  0.97264    
    8754  0.97539    
    8755  0.97814    
    8756  0.98090    
    8757  0.98366    
 
  ***** POST1 NODAL DEGREE OF FREEDOM LISTING *****                            
 
  LOAD STEP=     3  SUBSTEP=    17                                             
   TIME=    82.250      LOAD CASE=   0                                         
 
    NODE      TEMP  
    8758  0.98642    
    8759  0.98919    
    8760  0.99197    
    8761  0.99476    
    8762  0.99761    
    8763   1.0017    
    8764   1.0160    
    8765   1.2808    
    8766   1.3254    
    8767   1.3361    
    8768   1.3334    
    8769   1.3364    
    8770   1.3397    
    8771   1.3430    
    8772   1.3464    
    8773   1.3497    
    8774   1.3531    
    8775   1.3564    
    8776   1.3598    
    8777   1.3631    
    8778   1.3665    
    8779   1.3699    
    8780   1.3732    
    8781   1.3766    
    8782   1.3800    
    8783   1.3834    
    8784   1.3868    
    8785   1.3902    
    8786   1.3936    
    8787   1.3970    
    8788   1.4004    
    8789   1.4038    
    8790   1.4073    
    8791   1.4108    
    8792   1.4153    
    8793   1.4310    
   13699   1.3526    
   13700   1.1811    
   13701  0.76798    
 
  ***** POST1 NODAL DEGREE OF FREEDOM LISTING *****                            
 
  LOAD STEP=     3  SUBSTEP=    17                                             
   TIME=    82.250      LOAD CASE=   0                                         
 
    NODE      TEMP  
   13702  0.30392    
   13703 -0.45365E-01
   13704 -0.19099    
   13705 -0.10788    
   13706  0.17929    
   13707  0.58495    
   13708  0.95124    
   13759   1.2341    
   13760   1.2255    
   13761   1.2280    
   13762   1.2313    
   13763   1.2346    
   13764   1.2380    
   13765   1.2414    
   13766   1.2448    
   13767   1.2482    
   13768   1.2516    
   13769   1.2550    
   13770   1.2584    
   13771   1.2618    
   13772   1.2653    
   13773   1.2687    
   13774   1.2721    
   13775   1.2755    
   13776   1.2790    
   13777   1.2824    
   13778   1.2859    
   13779   1.2893    
   13780   1.2928    
   13781   1.2962    
   13782   1.2997    
   13783   1.3031    
   13784   1.3066    
   13785   1.3101    
   13786   1.3143    
   13787   1.3294    
   13933   1.0710    
   13934   1.0624    
   13935   1.0646    
 
  ***** POST1 NODAL DEGREE OF FREEDOM LISTING *****                            
 
  LOAD STEP=     3  SUBSTEP=    17                                             
   TIME=    82.250      LOAD CASE=   0                                         
 
    NODE      TEMP  
   13936   1.0677    
   13937   1.0709    
   13938   1.0740    
   13939   1.0772    
   13940   1.0804    
   13941   1.0835    
   13942   1.0867    
   13943   1.0899    
   13944   1.0931    
   13945   1.0963    
   13946   1.0995    
   13947   1.1027    
   13948   1.1059    
   13949   1.1091    
   13950   1.1124    
   13951   1.1156    
   13952   1.1188    
   13953   1.1220    
   13954   1.1253    
   13955   1.1285    
   13956   1.1317    
   13957   1.1350    
   13958   1.1383    
   13959   1.1415    
   13960   1.1455    
   13961   1.1596    
   13962  0.67932    
   13963  0.67110    
   13964  0.67245    
   13965  0.67496    
   13966  0.67752    
   13967  0.68011    
   13968  0.68269    
   13969  0.68528    
   13970  0.68787    
   13971  0.69047    
   13972  0.69307    
   13973  0.69567    
   13974  0.69828    
 
  ***** POST1 NODAL DEGREE OF FREEDOM LISTING *****                            
 
  LOAD STEP=     3  SUBSTEP=    17                                             
   TIME=    82.250      LOAD CASE=   0                                         
 
    NODE      TEMP  
   13975  0.70089    
   13976  0.70351    
   13977  0.70612    
   13978  0.70875    
   13979  0.71137    
   13980  0.71401    
   13981  0.71664    
   13982  0.71928    
   13983  0.72192    
   13984  0.72457    
   13985  0.72722    
   13986  0.72987    
   13987  0.73255    
   13988  0.73522    
   13989  0.73869    
   13990  0.75090    
   13991  0.24355    
   13992  0.23559    
   13993  0.23588    
   13994  0.23761    
   13995  0.23937    
   13996  0.24115    
   13997  0.24293    
   13998  0.24472    
   13999  0.24651    
   14000  0.24830    
   14001  0.25010    
   14002  0.25190    
   14003  0.25370    
   14004  0.25551    
   14005  0.25732    
   14006  0.25914    
   14007  0.26095    
   14008  0.26278    
   14009  0.26460    
   14010  0.26643    
   14011  0.26826    
   14012  0.27010    
   14013  0.27194    
 
  ***** POST1 NODAL DEGREE OF FREEDOM LISTING *****                            
 
  LOAD STEP=     3  SUBSTEP=    17                                             
   TIME=    82.250      LOAD CASE=   0                                         
 
    NODE      TEMP  
   14014  0.27378    
   14015  0.27563    
   14016  0.27749    
   14017  0.27935    
   14018  0.28212    
   14019  0.29179    
   14020 -0.75530E-01
   14021 -0.83521E-01
   14022 -0.84299E-01
   14023 -0.83460E-01
   14024 -0.82583E-01
   14025 -0.81691E-01
   14026 -0.80796E-01
   14027 -0.79897E-01
   14028 -0.78994E-01
   14029 -0.78089E-01
   14030 -0.77180E-01
   14031 -0.76268E-01
   14032 -0.75353E-01
   14033 -0.74434E-01
   14034 -0.73512E-01
   14035 -0.72587E-01
   14036 -0.71659E-01
   14037 -0.70727E-01
   14038 -0.69792E-01
   14039 -0.68854E-01
   14040 -0.67912E-01
   14041 -0.66967E-01
   14042 -0.66019E-01
   14043 -0.65068E-01
   14044 -0.64113E-01
   14045 -0.63144E-01
   14046 -0.62173E-01
   14047 -0.60252E-01
   14048 -0.53247E-01
   14049 -0.19114    
   14050 -0.19968    
   14051 -0.20144    
   14052 -0.20151    
 
  ***** POST1 NODAL DEGREE OF FREEDOM LISTING *****                            
 
  LOAD STEP=     3  SUBSTEP=    17                                             
   TIME=    82.250      LOAD CASE=   0                                         
 
    NODE      TEMP  
   14053 -0.20155    
   14054 -0.20157    
   14055 -0.20158    
   14056 -0.20160    
   14057 -0.20160    
   14058 -0.20161    
   14059 -0.20161    
   14060 -0.20162    
   14061 -0.20161    
   14062 -0.20161    
   14063 -0.20160    
   14064 -0.20158    
   14065 -0.20157    
   14066 -0.20155    
   14067 -0.20153    
   14068 -0.20150    
   14069 -0.20147    
   14070 -0.20144    
   14071 -0.20141    
   14072 -0.20137    
   14073 -0.20133    
   14074 -0.20128    
   14075 -0.20121    
   14076 -0.20025    
   14077 -0.19572    
   14078 -0.78594E-01
   14079 -0.88294E-01
   14080 -0.90903E-01
   14081 -0.91894E-01
   14082 -0.92848E-01
   14083 -0.93787E-01
   14084 -0.94722E-01
   14085 -0.95654E-01
   14086 -0.96583E-01
   14087 -0.97508E-01
   14088 -0.98430E-01
   14089 -0.99349E-01
   14090 -0.10027    
   14091 -0.10118    
 
  ***** POST1 NODAL DEGREE OF FREEDOM LISTING *****                            
 
  LOAD STEP=     3  SUBSTEP=    17                                             
   TIME=    82.250      LOAD CASE=   0                                         
 
    NODE      TEMP  
   14092 -0.10209    
   14093 -0.10299    
   14094 -0.10390    
   14095 -0.10480    
   14096 -0.10569    
   14097 -0.10658    
   14098 -0.10747    
   14099 -0.10836    
   14100 -0.10924    
   14101 -0.11012    
   14102 -0.11100    
   14103 -0.11187    
   14104 -0.11270    
   14105 -0.11278    
   14106 -0.11043    
   14107  0.23720    
   14108  0.22584    
   14109  0.22251    
   14110  0.22060    
   14111  0.21873    
   14112  0.21689    
   14113  0.21504    
   14114  0.21320    
   14115  0.21136    
   14116  0.20952    
   14117  0.20769    
   14118  0.20586    
   14119  0.20403    
   14120  0.20221    
   14121  0.20039    
   14122  0.19857    
   14123  0.19676    
   14124  0.19495    
   14125  0.19315    
   14126  0.19134    
   14127  0.18954    
   14128  0.18775    
   14129  0.18596    
   14130  0.18417    
 
  ***** POST1 NODAL DEGREE OF FREEDOM LISTING *****                            
 
  LOAD STEP=     3  SUBSTEP=    17                                             
   TIME=    82.250      LOAD CASE=   0                                         
 
    NODE      TEMP  
   14131  0.18239    
   14132  0.18060    
   14133  0.17888    
   14134  0.17774    
   14135  0.17826    
   14136  0.66924    
   14137  0.65605    
   14138  0.65212    
   14139  0.64935    
   14140  0.64663    
   14141  0.64393    
   14142  0.64123    
   14143  0.63854    
   14144  0.63584    
   14145  0.63316    
   14146  0.63047    
   14147  0.62779    
   14148  0.62512    
   14149  0.62244    
   14150  0.61978    
   14151  0.61711    
   14152  0.61445    
   14153  0.61179    
   14154  0.60914    
   14155  0.60649    
   14156  0.60384    
   14157  0.60120    
   14158  0.59856    
   14159  0.59592    
   14160  0.59329    
   14161  0.59066    
   14162  0.58809    
   14163  0.58595    
   14164  0.58497    
   14165   1.0564    
   14166   1.0417    
   14167   1.0373    
   14168   1.0339    
   14169   1.0305    
 
  ***** POST1 NODAL DEGREE OF FREEDOM LISTING *****                            
 
  LOAD STEP=     3  SUBSTEP=    17                                             
   TIME=    82.250      LOAD CASE=   0                                         
 
    NODE      TEMP  
   14170   1.0271    
   14171   1.0237    
   14172   1.0203    
   14173   1.0170    
   14174   1.0136    
   14175   1.0102    
   14176   1.0069    
   14177   1.0035    
   14178   1.0002    
   14179  0.99682    
   14180  0.99347    
   14181  0.99013    
   14182  0.98680    
   14183  0.98347    
   14184  0.98014    
   14185  0.97682    
   14186  0.97350    
   14187  0.97018    
   14188  0.96687    
   14189  0.96356    
   14190  0.96026    
   14191  0.95701    
   14192  0.95405    
   14193  0.95195    
   19099   1.2138    
   19100  0.80863    
   19101  0.35785    
   19102  0.27829E-01
   19103 -0.91776E-01
   19104  0.24469E-01
   19105  0.35065    
   19106  0.79645    
   19107   1.1945    
   19153   1.2863    
   19154   1.2717    
   19155   1.2678    
   19156   1.2644    
   19157   1.2610    
   19158   1.2577    
 
  ***** POST1 NODAL DEGREE OF FREEDOM LISTING *****                            
 
  LOAD STEP=     3  SUBSTEP=    17                                             
   TIME=    82.250      LOAD CASE=   0                                         
 
    NODE      TEMP  
   19159   1.2543    
   19160   1.2510    
   19161   1.2477    
   19162   1.2444    
   19163   1.2410    
   19164   1.2377    
   19165   1.2344    
   19166   1.2311    
   19167   1.2278    
   19168   1.2245    
   19169   1.2212    
   19170   1.2179    
   19171   1.2146    
   19172   1.2114    
   19173   1.2081    
   19174   1.2048    
   19175   1.2015    
   19176   1.1983    
   19177   1.1950    
   19178   1.1918    
   19179   1.1886    
   19180   1.1864    
   19181   1.1951    
   19182  0.86802    
   19183  0.85459    
   19184  0.85085    
   19185  0.84812    
   19186  0.84534    
   19187  0.84260    
   19188  0.83986    
   19189  0.83713    
   19190  0.83441    
   19191  0.83169    
   19192  0.82897    
   19193  0.82626    
   19194  0.82355    
   19195  0.82085    
   19196  0.81815    
   19197  0.81545    
 
  ***** POST1 NODAL DEGREE OF FREEDOM LISTING *****                            
 
  LOAD STEP=     3  SUBSTEP=    17                                             
   TIME=    82.250      LOAD CASE=   0                                         
 
    NODE      TEMP  
   19198  0.81276    
   19199  0.81007    
   19200  0.80738    
   19201  0.80470    
   19202  0.80203    
   19203  0.79935    
   19204  0.79669    
   19205  0.79402    
   19206  0.79136    
   19207  0.78872    
   19208  0.78613    
   19209  0.78473    
   19210  0.79319    
   19211  0.39796    
   19212  0.38628    
   19213  0.38299    
   19214  0.38107    
   19215  0.37913    
   19216  0.37721    
   19217  0.37530    
   19218  0.37340    
   19219  0.37150    
   19220  0.36960    
   19221  0.36770    
   19222  0.36581    
   19223  0.36393    
   19224  0.36204    
   19225  0.36017    
   19226  0.35829    
   19227  0.35642    
   19228  0.35455    
   19229  0.35268    
   19230  0.35082    
   19231  0.34897    
   19232  0.34711    
   19233  0.34526    
   19234  0.34342    
   19235  0.34157    
   19236  0.33975    
 
  ***** POST1 NODAL DEGREE OF FREEDOM LISTING *****                            
 
  LOAD STEP=     3  SUBSTEP=    17                                             
   TIME=    82.250      LOAD CASE=   0                                         
 
    NODE      TEMP  
   19237  0.33796    
   19238  0.33764    
   19239  0.34584    
   19240  0.45010E-01
   19241  0.34997E-01
   19242  0.32362E-01
   19243  0.31337E-01
   19244  0.30315E-01
   19245  0.29308E-01
   19246  0.28307E-01
   19247  0.27310E-01
   19248  0.26317E-01
   19249  0.25327E-01
   19250  0.24341E-01
   19251  0.23358E-01
   19252  0.22378E-01
   19253  0.21402E-01
   19254  0.20429E-01
   19255  0.19459E-01
   19256  0.18493E-01
   19257  0.17531E-01
   19258  0.16571E-01
   19259  0.15615E-01
   19260  0.14663E-01
   19261  0.13714E-01
   19262  0.12768E-01
   19263  0.11826E-01
   19264  0.10887E-01
   19265  0.99639E-02
   19266  0.90764E-02
   19267  0.98504E-02
   19268  0.18066E-01
   19269 -0.99867E-01
   19270 -0.10867    
   19271 -0.11048    
   19272 -0.11059    
   19273 -0.11068    
   19274 -0.11076    
   19275 -0.11083    
 
  ***** POST1 NODAL DEGREE OF FREEDOM LISTING *****                            
 
  LOAD STEP=     3  SUBSTEP=    17                                             
   TIME=    82.250      LOAD CASE=   0                                         
 
    NODE      TEMP  
   19276 -0.11090    
   19277 -0.11097    
   19278 -0.11103    
   19279 -0.11109    
   19280 -0.11115    
   19281 -0.11120    
   19282 -0.11125    
   19283 -0.11130    
   19284 -0.11134    
   19285 -0.11138    
   19286 -0.11142    
   19287 -0.11146    
   19288 -0.11149    
   19289 -0.11151    
   19290 -0.11154    
   19291 -0.11156    
   19292 -0.11158    
   19293 -0.11159    
   19294 -0.11159    
   19295 -0.11156    
   19296 -0.10979    
   19297 -0.10103    
   19298 -0.10739E-01
   19299 -0.18925E-01
   19300 -0.19761E-01
   19301 -0.18956E-01
   19302 -0.18124E-01
   19303 -0.17280E-01
   19304 -0.16430E-01
   19305 -0.15577E-01
   19306 -0.14720E-01
   19307 -0.13860E-01
   19308 -0.12997E-01
   19309 -0.12130E-01
   19310 -0.11260E-01
   19311 -0.10387E-01
   19312 -0.95101E-02
   19313 -0.86300E-02
   19314 -0.77465E-02
 
  ***** POST1 NODAL DEGREE OF FREEDOM LISTING *****                            
 
  LOAD STEP=     3  SUBSTEP=    17                                             
   TIME=    82.250      LOAD CASE=   0                                         
 
    NODE      TEMP  
   19315 -0.68596E-02
   19316 -0.59693E-02
   19317 -0.50757E-02
   19318 -0.41787E-02
   19319 -0.32783E-02
   19320 -0.23745E-02
   19321 -0.14675E-02
   19322 -0.55670E-03
   19323  0.36901E-03
   19324  0.13249E-02
   19325  0.39315E-02
   19326  0.13852E-01
   19327  0.28720    
   19328  0.27910    
   19329  0.27935    
   19330  0.28104    
   19331  0.28277    
   19332  0.28452    
   19333  0.28627    
   19334  0.28802    
   19335  0.28978    
   19336  0.29154    
   19337  0.29330    
   19338  0.29507    
   19339  0.29684    
   19340  0.29861    
   19341  0.30039    
   19342  0.30217    
   19343  0.30396    
   19344  0.30575    
   19345  0.30754    
   19346  0.30934    
   19347  0.31114    
   19348  0.31294    
   19349  0.31475    
   19350  0.31656    
   19351  0.31837    
   19352  0.32020    
   19353  0.32206    
 
  ***** POST1 NODAL DEGREE OF FREEDOM LISTING *****                            
 
  LOAD STEP=     3  SUBSTEP=    17                                             
   TIME=    82.250      LOAD CASE=   0                                         
 
    NODE      TEMP  
   19354  0.32536    
   19355  0.33693    
   19356  0.70604    
   19357  0.69773    
   19358  0.69905    
   19359  0.70155    
   19360  0.70409    
   19361  0.70665    
   19362  0.70921    
   19363  0.71178    
   19364  0.71435    
   19365  0.71692    
   19366  0.71950    
   19367  0.72208    
   19368  0.72467    
   19369  0.72726    
   19370  0.72985    
   19371  0.73245    
   19372  0.73505    
   19373  0.73766    
   19374  0.74027    
   19375  0.74288    
   19376  0.74550    
   19377  0.74812    
   19378  0.75074    
   19379  0.75337    
   19380  0.75601    
   19381  0.75866    
   19382  0.76134    
   19383  0.76516    
   19384  0.77849    
   19385   1.0836    
   19386   1.0751    
   19387   1.0772    
   19388   1.0803    
   19389   1.0834    
   19390   1.0866    
   19391   1.0897    
   19392   1.0929    
 
                          
 
  LOAD STEP=     3  SUBSTEP=    17                                             
   TIME=    82.250      LOAD CASE=   0                                         
 
    NODE      TEMP  
   19393   1.0961    
   19394   1.0992    
   19395   1.1024    
   19396   1.1056    
   19397   1.1088    
   19398   1.1120    
   19399   1.1152    
   19400   1.1184    
   19401   1.1216    
   19402   1.1248    
   19403   1.1280    
   19404   1.1312    
   19405   1.1344    
   19406   1.1377    
   19407   1.1409    
   19408   1.1441    
   19409   1.1473    
   19410   1.1506    
   19411   1.1539    
   19412   1.1580    
   19413   1.1727    

  
