# Supplementary material for: Thermal Analyses and Responses of Bridge Deck Hydronic Snow Melting System
Source: Hindawi journal article supplement (doi:10.1155/2019/8172494), 2019-01-01
Supplement: f1 [file 8172494.f1.zip › 8172494.f1/spacing of 10mm/depth of 9mm.txt]

/PREP7  
*SET,pi,acos(-1)
*SET,d,0.02
*SET,L,0.2 
*SET,dens,1000  

*SET,carea,pi*(d**2)/4  

*SET,width,0.1
*SET,high,0.09 
*SET,high1,0.21


*SET,T1,-5  
*SET,T2,15  

ET,1,FLUID116   
!*  
KEYOPT,1,1,1
KEYOPT,1,2,2
KEYOPT,1,4,1
KEYOPT,1,5,0
!*  
ET,2,SOLID70

ET,3,SURF152
KEYOPT,3,1,0
KEYOPT,3,2,0
KEYOPT,3,3,0
KEYOPT,3,4,1
KEYOPT,3,5,0
KEYOPT,3,6,0
KEYOPT,3,7,0
KEYOPT,3,8,2
KEYOPT,3,9,0

ET,4,PLANE55

R,1,d,carea,1   
RMORE,pi*d*L/2,pi*d*L/2,0,0.023,0.8,0.3 
R,3, , , , , ,  
MP,KXX,1,2.16   

MP,C,1,4.187
 
MP,DENS,1,1000 
 
MP,VISC,1,3.96  
  
MP,KXX,2,9.66 
 
MP,C,2,0.966
 
MP,DENS,2,2450 


MP,KXX,4,5.54  
 
MP,C,4,1.68
 
MP,DENS,4,2100 


RECTNG,0,5*width,0,high1,
WPSTYLE,,,,,,,,1
wpoff,width/2,high1-high,0  
wpro,,90.000000,
ASBW,       1   
wpoff,0,0,-0.04
ASBW,all   
wpro,,,90.000000
aSBW,all  
*do,i,1,4
wpoff,0,0,width 
aSBW,all
*enddo
WPSTYLE,,,,,,,,0

TYPE,   4   
MAT,       2
REAL,       3    


LESIZE,2, , ,5, , , , ,1  
LESIZE,4, , ,5, , , , ,1  
LESIZE,11, , ,4, , , , ,1 
LESIZE,12, , ,4, , , , ,1   

LESIZE,5, , ,8,0.5, , , ,1
LESIZE,6, , ,8,0.5, , , ,1 
LESIZE,18, , ,8,0.5, , , ,1 
*do,i,23,44,7
LESIZE,i, , ,8,0.5, , , ,1 
*enddo
LESIZE,17, , ,5, , , , ,1 
LESIZE,43, , ,5, , , , ,1 

LESIZE,28, , ,10, , , , ,1 
LESIZE,35, , ,10, , , , ,1 
LESIZE,42, , ,10, , , , ,1 
LESIZE,49, , ,10, , , , ,1

MSHAPE,0,2D 
MSHKEY,1
AMESH,all 
TYPE,   2   
MAT,       2
REAL,       3   
ESYS,       0   
ESIZE,0,30, 
VEXT,all, , ,0,0,6,,,, 

NSEL,S,LOC,Y,0.17,0.21  
ESLN,S  
EMODIF,all,MAT,4,  
allsel,all


TYPE,   3   
MAT,       4
REAL,       3   
ESYS,       0  
NSEL,S,LOC,Y,0.21   
ESURF,0    

ALLSEL,ALL 

TYPE,   1  
MAT,       1
REAL,       1   
ESYS,       0   
NSEL,S,LOC,Y,high1-high 
NSEL,R,LOC,X,0.5*width,4.5*width
NSEL,U,LOC,X,0.5*width+0.001,1.5*width-0.001
NSEL,U,LOC,X,1.5*width+0.001,2.5*width-0.001
NSEL,U,LOC,X,2.5*width+0.001,3.5*width-0.001 
NSEL,U,LOC,X,3.5*width+0.001,4.5*width-0.001 
NPLOT   

N,58000,0.5*width,high1-high,0,,,,  
N,58030,0.5*width,high1-high,6,,,,  
FILL,58000,58030,29, , ,1,1,1
 
N,58031,1.5*width,high1-high,6,,,,  
N,58061,1.5*width,high1-high,0,,,,  
FILL,58031,58061,29, , ,1,1,1

N,58062,2.5*width,high1-high,0,,,,  
N,58092,2.5*width,high1-high,6,,,,  
FILL,58062,58092,29, , ,1,1,1
 
N,58093,3.5*width,high1-high,6,,,,  
N,58123,3.5*width,high1-high,0,,,,  
FILL,58093,58123,29, , ,1,1,1

N,58124,4.5*width,high1-high,0,,,,  
N,58154,4.5*width,high1-high,6,,,,  
FILL,58124,58154,29, , ,1,1,1


e,58000,58001,79,3220
*do,i,58001,58028
e,i,i+1,i-54781,i-54780
*enddo
e,58029,58030,3248,3085
e,58030,58031,3085,10469
e,58031,58032,10469,10606
*do,i,58032,58059
e,i,i+1,68638-i,68637-i
*enddo
e,58060,58061,10578,329
e,58061,58062,329,509
e,58062,58063,509,15978
*do,i,58063,58090
e,i,i+1,i-42085,i-42084
*enddo
e,58091,58092,16006,15869
e,58092,58093,15869,21089
e,58093,58094,21089,21226
*do,i,58094,58121
e,i,i+1,79320-i,79319-i
*enddo
e,58122,58123,21198,683
e,58123,58124,683,141
e,58124,58125,141,4840
*do,i,58125,58152
e,i,i+1,i-53285,i-53284
*enddo
e,58153,58154,4868,4713
ALLSEL,ALL 
ESEL,S,TYPE,,4  
ACLEAR,all
ALLSEL,ALL 


FINISH 
/SOLU 
ESEL,S,TYPE,,2  
ESEL,A,TYPE,,3  
NSLE,S 
IC,all,TEMP,-2.5,  

*DEL,_FNCNAME   
*DEL,_FNCMTID   
*DEL,_FNCCSYS   
*SET,_FNCNAME,'hw'  
*SET,_FNCCSYS,0 
! /INPUT,temp3.func,,,1 
*DIM,%_FNCNAME%,TABLE,6,24,1,,,,%_FNCCSYS%  
!   
! Begin of equation: 2.5*(0.96*sin(PI*({TIME}-9)/12)+0.14*sin(PI*({TIME}-9)/6)) 
! -2.5  
*SET,%_FNCNAME%(0,0,1), 0.0, -999   
*SET,%_FNCNAME%(2,0,1), 0.0 
*SET,%_FNCNAME%(3,0,1), 0.0 
*SET,%_FNCNAME%(4,0,1), 0.0 
*SET,%_FNCNAME%(5,0,1), 0.0 
*SET,%_FNCNAME%(6,0,1), 0.0 
*SET,%_FNCNAME%(0,1,1), 1.0, -1, 0, 9, 0, 0, 1  
*SET,%_FNCNAME%(0,2,1), 0.0, -2, 0, 1, 1, 2, -1 
*SET,%_FNCNAME%(0,3,1),   0, -1, 0, 3.14159265358979310, 0, 0, -2   
*SET,%_FNCNAME%(0,4,1), 0.0, -3, 0, 1, -1, 3, -2
*SET,%_FNCNAME%(0,5,1), 0.0, -1, 0, 12, 0, 0, -3
*SET,%_FNCNAME%(0,6,1), 0.0, -2, 0, 1, -3, 4, -1
*SET,%_FNCNAME%(0,7,1), 0.0, -1, 9, 1, -2, 0, 0 
*SET,%_FNCNAME%(0,8,1), 0.0, -2, 0, 0.96, 0, 0, -1  
*SET,%_FNCNAME%(0,9,1), 0.0, -3, 0, 1, -2, 3, -1
*SET,%_FNCNAME%(0,10,1), 0.0, -1, 0, 9, 0, 0, 1 
*SET,%_FNCNAME%(0,11,1), 0.0, -2, 0, 1, 1, 2, -1
*SET,%_FNCNAME%(0,12,1), 0.0, -1, 0, 3.14159265358979310, 0, 0, -2  
*SET,%_FNCNAME%(0,13,1), 0.0, -4, 0, 1, -1, 3, -2   
*SET,%_FNCNAME%(0,14,1), 0.0, -1, 0, 6, 0, 0, -4
*SET,%_FNCNAME%(0,15,1), 0.0, -2, 0, 1, -4, 4, -1   
*SET,%_FNCNAME%(0,16,1), 0.0, -1, 9, 1, -2, 0, 0
*SET,%_FNCNAME%(0,17,1), 0.0, -2, 0, 0.14, 0, 0, -1 
*SET,%_FNCNAME%(0,18,1), 0.0, -4, 0, 1, -2, 3, -1   
*SET,%_FNCNAME%(0,19,1), 0.0, -1, 0, 1, -3, 1, -4   
*SET,%_FNCNAME%(0,20,1), 0.0, -2, 0, 2.5, 0, 0, -1  
*SET,%_FNCNAME%(0,21,1), 0.0, -3, 0, 1, -2, 3, -1   
*SET,%_FNCNAME%(0,22,1), 0.0, -1, 0, 2.5, 0, 0, -3  
*SET,%_FNCNAME%(0,23,1), 0.0, -2, 0, 1, -3, 2, -1   
*SET,%_FNCNAME%(0,24,1), 0.0, 99, 0, 1, -2, 0, 0
! End of equation: 2.5*(0.96*sin(PI*({TIME}-9)/12)+0.14*sin(PI*({TIME}-9)/6))-2 
! .5
!-->


ESEL,S,TYPE,,3  
SFE,all,1,CONV, ,26.3   
SFE,all,1,CONV,2, %HW% 

ALLSEL,ALL 


ASEL,S,LOC,X,0  
ASEL,A,LOC,X,5*width
ASEL,A,LOC,Y,0  
ASEL,A,LOC,Z,0  
ASEL,A,LOC,Z,6 
NSLA,S,1
SF,all,HFLUX,0 
ALLSEL,ALL 


ANTYPE,4
DELTIM,2,0,0
OUTRES,ERASE
OUTRES,ALL,1
KBC,0.0 
TIME,88
TIMINT,1
TOFFST,273, 

solve

DELTIM,0.02,0,0  
TIME,88.02
d,58000,temp,T2 
esel,s,ename,,fluid116  
sfe,all,,hflux,,2160*carea*dens 
ALLSEL,ALL  
solve
DELTIM,0.25,0,0  
TIME,90.25
solve

/POST26 
NUMVAR,200  
FILLDATA,191,,,,1,1 
REALVAR,191,191 
!*  
NSOL,2,919,TEMP,,TEMP_2   
STORE,MERGE 
!*  
NSOL,3,38,TEMP,, TEMP_3
STORE,MERGE 
PRVAR,2,3,  

NSEL,S,LOC,Y,0.21   
NSEL,R,LOC,Z,6  
/POST1  
!*  
FLST,2,51,1 
FITEM,2,1999
FITEM,2,2001
FITEM,2,2002
FITEM,2,2003
FITEM,2,2004
FITEM,2,2000
FITEM,2,8839
FITEM,2,8840
FITEM,2,8841
FITEM,2,8842
FITEM,2,8843
FITEM,2,8844
FITEM,2,8845
FITEM,2,8846
FITEM,2,8847
FITEM,2,6859
FITEM,2,6861
FITEM,2,6862
FITEM,2,6863
FITEM,2,6864
FITEM,2,6865
FITEM,2,6866
FITEM,2,6867
FITEM,2,6868
FITEM,2,6869
FITEM,2,6860
FITEM,2,19459   
FITEM,2,19460   
FITEM,2,19461   
FITEM,2,19462   
FITEM,2,19463   
FITEM,2,19464   
FITEM,2,19465   
FITEM,2,19466   
FITEM,2,19467   
FITEM,2,14059   
FITEM,2,14060   
FITEM,2,14061   
FITEM,2,14062   
FITEM,2,14063   
FITEM,2,14064   
FITEM,2,14065   
FITEM,2,14066   
FITEM,2,14067   
FITEM,2,14068   
FITEM,2,925 
FITEM,2,929 
FITEM,2,928 
FITEM,2,927 
FITEM,2,926 
FITEM,2,919 
!*  
PATH,t,51,10,1, 
PPATH,P51X,1
PATH,STAT   
!*  
!*  
PDEF,r,TEMP, ,AVG   
/PBC,PATH, ,0   
!*  
PRANGE,1,0,2,XG,
PRANGE,1,0,2,XG,
PRPATH,R
