# Supplementary material for: Thermal Analyses and Responses of Bridge Deck Hydronic Snow Melting System
Source: Hindawi journal article supplement (doi:10.1155/2019/8172494), 2019-01-01
Supplement: f1 [file 8172494.f1.zip › 8172494.f1/spacing of 15mm/depth of 7mm.txt]

/PREP7  
*SET,pi,acos(-1)
*SET,d,0.02
*SET,L,0.2 
*SET,dens,1000  

*SET,carea,pi*(d**2)/4  

*SET,width,0.15
*SET,high,0.07 
*SET,high1,0.21


*SET,T1,-5  
*SET,T2,15  

ET,1,FLUID116   
!*  
KEYOPT,1,1,1
KEYOPT,1,2,2
KEYOPT,1,4,1
KEYOPT,1,5,0
!*  
ET,2,SOLID70

ET,3,SURF152
KEYOPT,3,1,0
KEYOPT,3,2,0
KEYOPT,3,3,0
KEYOPT,3,4,1
KEYOPT,3,5,0
KEYOPT,3,6,0
KEYOPT,3,7,0
KEYOPT,3,8,2
KEYOPT,3,9,0

ET,4,PLANE55

R,1,d,carea,1   
RMORE,pi*d*L/2,pi*d*L/2,0,0.023,0.8,0.3 
R,3, , , , , ,  
MP,KXX,1,2.16   

MP,C,1,4.187
 
MP,DENS,1,1000 
 
MP,VISC,1,3.96  
  
MP,KXX,2,9.66 
 
MP,C,2,0.966
 
MP,DENS,2,2450 


MP,KXX,4,5.54  
 
MP,C,4,1.68
 
MP,DENS,4,2100 


RECTNG,0,5*width,0,high1,
WPSTYLE,,,,,,,,1
wpoff,width/2,high1-high,0  
wpro,,90.000000,
ASBW,       1   


wpro,,,90.000000
aSBW,all  
*do,i,1,4
wpoff,0,0,width 
aSBW,all
*enddo
WPSTYLE,,,,,,,,0

TYPE,   4   
MAT,       2
REAL,       3    


LESIZE,8, , ,7, , , , ,1  
LESIZE,9, , ,7, , , , ,1  

LESIZE,5, , ,9,0.5, , , ,1
LESIZE,6, , ,9,0.5, , , ,1 
LESIZE,23, , ,9,0.5, , , ,1 
*do,i,7,16,3
LESIZE,i, , ,9,0.5, , , ,1 
*enddo
LESIZE,4, , ,5, , , , ,1 
LESIZE,12, , ,5, , , , ,1 

LESIZE,19, , ,10, , , , ,1 
LESIZE,22, , ,10, , , , ,1 
LESIZE,29, , ,10, , , , ,1 
LESIZE,34, , ,10, , , , ,1

MSHAPE,0,2D 
MSHKEY,1
AMESH,all 
TYPE,   2   
MAT,       2
REAL,       3   
ESYS,       0   
ESIZE,0,30, 
VEXT,all, , ,0,0,6,,,, 

NSEL,S,LOC,Y,0.17,0.21  
ESLN,S  
EMODIF,all,MAT,4,  
allsel,all


TYPE,   3   
MAT,       4
REAL,       3   
ESYS,       0  
NSEL,S,LOC,Y,0.21   
ESURF,0    

ALLSEL,ALL 

TYPE,   1  
MAT,       1
REAL,       1   
ESYS,       0   
NSEL,S,LOC,Y,high1-high 
NSEL,R,LOC,X,0.5*width,4.5*width
NSEL,U,LOC,X,0.5*width+0.001,1.5*width-0.001
NSEL,U,LOC,X,1.5*width+0.001,2.5*width-0.001
NSEL,U,LOC,X,2.5*width+0.001,3.5*width-0.001 
NSEL,U,LOC,X,3.5*width+0.001,4.5*width-0.001 
NPLOT   

N,58000,0.5*width,high1-high,0,,,,  
N,58030,0.5*width,high1-high,6,,,,  
FILL,58000,58030,29, , ,1,1,1
 
N,58031,1.5*width,high1-high,6,,,,  
N,58061,1.5*width,high1-high,0,,,,  
FILL,58031,58061,29, , ,1,1,1

N,58062,2.5*width,high1-high,0,,,,  
N,58092,2.5*width,high1-high,6,,,,  
FILL,58062,58092,29, , ,1,1,1
 
N,58093,3.5*width,high1-high,6,,,,  
N,58123,3.5*width,high1-high,0,,,,  
FILL,58093,58123,29, , ,1,1,1

N,58124,4.5*width,high1-high,0,,,,  
N,58154,4.5*width,high1-high,6,,,,  
FILL,58124,58154,29, , ,1,1,1


e,58000,58001,7,1015
*do,i,58001,58028
e,i,i+1,i-56986,i-56985
*enddo
e,58029,58030,1043,874
e,58030,58031,874,4488
e,58031,58032,4488,4635
*do,i,58032,58059
e,i,i+1,62667-i,62666-i
*enddo
e,58060,58061,4607,141
e,58061,58062,141,132
e,58062,58063,132,4665
*do,i,58063,58090
e,i,i+1,i-53398,i-53397
*enddo
e,58091,58092,4693,4479
e,58092,58093,4479,17198
e,58093,58094,17198,17345
*do,i,58094,58121
e,i,i+1,75439-i,75438-i
*enddo
e,58122,58123,17317,555
e,58123,58124,555,76
e,58124,58125,76,2815
*do,i,58125,58152
e,i,i+1,i-55310,i-55309
*enddo
e,58153,58154,2843,2683
ALLSEL,ALL 
ESEL,S,TYPE,,4  
ACLEAR,all
ALLSEL,ALL 


FINISH 
/SOLU 
ESEL,S,TYPE,,2  
ESEL,A,TYPE,,3  
NSLE,S 
IC,all,TEMP,-2.5,  

*DEL,_FNCNAME   
*DEL,_FNCMTID   
*DEL,_FNCCSYS   
*SET,_FNCNAME,'hw'  
*SET,_FNCCSYS,0 
! /INPUT,temp3.func,,,1 
*DIM,%_FNCNAME%,TABLE,6,24,1,,,,%_FNCCSYS%  
!   
! Begin of equation: 2.5*(0.96*sin(PI*({TIME}-9)/12)+0.14*sin(PI*({TIME}-9)/6)) 
! -2.5  
*SET,%_FNCNAME%(0,0,1), 0.0, -999   
*SET,%_FNCNAME%(2,0,1), 0.0 
*SET,%_FNCNAME%(3,0,1), 0.0 
*SET,%_FNCNAME%(4,0,1), 0.0 
*SET,%_FNCNAME%(5,0,1), 0.0 
*SET,%_FNCNAME%(6,0,1), 0.0 
*SET,%_FNCNAME%(0,1,1), 1.0, -1, 0, 9, 0, 0, 1  
*SET,%_FNCNAME%(0,2,1), 0.0, -2, 0, 1, 1, 2, -1 
*SET,%_FNCNAME%(0,3,1),   0, -1, 0, 3.14159265358979310, 0, 0, -2   
*SET,%_FNCNAME%(0,4,1), 0.0, -3, 0, 1, -1, 3, -2
*SET,%_FNCNAME%(0,5,1), 0.0, -1, 0, 12, 0, 0, -3
*SET,%_FNCNAME%(0,6,1), 0.0, -2, 0, 1, -3, 4, -1
*SET,%_FNCNAME%(0,7,1), 0.0, -1, 9, 1, -2, 0, 0 
*SET,%_FNCNAME%(0,8,1), 0.0, -2, 0, 0.96, 0, 0, -1  
*SET,%_FNCNAME%(0,9,1), 0.0, -3, 0, 1, -2, 3, -1
*SET,%_FNCNAME%(0,10,1), 0.0, -1, 0, 9, 0, 0, 1 
*SET,%_FNCNAME%(0,11,1), 0.0, -2, 0, 1, 1, 2, -1
*SET,%_FNCNAME%(0,12,1), 0.0, -1, 0, 3.14159265358979310, 0, 0, -2  
*SET,%_FNCNAME%(0,13,1), 0.0, -4, 0, 1, -1, 3, -2   
*SET,%_FNCNAME%(0,14,1), 0.0, -1, 0, 6, 0, 0, -4
*SET,%_FNCNAME%(0,15,1), 0.0, -2, 0, 1, -4, 4, -1   
*SET,%_FNCNAME%(0,16,1), 0.0, -1, 9, 1, -2, 0, 0
*SET,%_FNCNAME%(0,17,1), 0.0, -2, 0, 0.14, 0, 0, -1 
*SET,%_FNCNAME%(0,18,1), 0.0, -4, 0, 1, -2, 3, -1   
*SET,%_FNCNAME%(0,19,1), 0.0, -1, 0, 1, -3, 1, -4   
*SET,%_FNCNAME%(0,20,1), 0.0, -2, 0, 2.5, 0, 0, -1  
*SET,%_FNCNAME%(0,21,1), 0.0, -3, 0, 1, -2, 3, -1   
*SET,%_FNCNAME%(0,22,1), 0.0, -1, 0, 2.5, 0, 0, -3  
*SET,%_FNCNAME%(0,23,1), 0.0, -2, 0, 1, -3, 2, -1   
*SET,%_FNCNAME%(0,24,1), 0.0, 99, 0, 1, -2, 0, 0
! End of equation: 2.5*(0.96*sin(PI*({TIME}-9)/12)+0.14*sin(PI*({TIME}-9)/6))-2 
! .5
!-->


ESEL,S,TYPE,,3  
SFE,all,1,CONV, ,26.3   
SFE,all,1,CONV,2, %HW% 

ALLSEL,ALL 


ASEL,S,LOC,X,0  
ASEL,A,LOC,X,5*width
ASEL,A,LOC,Y,0  
ASEL,A,LOC,Z,0  
ASEL,A,LOC,Z,6 
NSLA,S,1
SF,all,HFLUX,0 
ALLSEL,ALL 


ANTYPE,4
DELTIM,2,0,0
OUTRES,ERASE
OUTRES,ALL,1
KBC,0.0 
TIME,88
TIMINT,1
TOFFST,273, 

solve

DELTIM,0.02,0,0  
TIME,88.02
d,58000,temp,T2 
esel,s,ename,,fluid116  
sfe,all,,hflux,,2160*carea*dens 
ALLSEL,ALL  
solve
DELTIM,0.25,0,0  
TIME,90.25
solve
/PREP7  
ETCHG,TTS
!*  
!*  
!*  

MPTEMP,,,,,,,,  
MPTEMP,1,0  
MPDATA,EX,2,,3e10  
MPDATA,PRXY,2,,0.15 
MPTEMP,,,,,,,,  
MPTEMP,1,0  
UIMP,2,REFT,,,  
MPDATA,ALPX,2,,1e-5 
MPTEMP,,,,,,,,  
MPTEMP,1,0  
UIMP,4,REFT,,,  
MPDATA,ALPX,4,,2e-5 
MPTEMP,,,,,,,,  
MPTEMP,1,0  
MPDATA,EX,4,,1.2e9    
MPDATA,PRXY,4,,0.25 


ESEL,S,MAT,,2   
MPCHG,2,all,
ESEL,S,MAT,,4   
MPCHG,4,all,
ALLSEL,ALL  
NSEL,S,LOC,Y,0  
D,all, , , , , ,UY, , , , ,
NSEL,S,LOC,X,0  
NSEL,A,LOC,X,0.75   
D,all, , , , , ,UX, , , , ,
NSEL,S,LOC,Z,0  
NSEL,A,LOC,Z,6  
D,all, , , , , ,UZ, , , , ,
ALLSEL,ALL  
/SOL
ACEL,0,9.8,0,   
LDREAD,TEMP,,,88, ,'wedu','rth',' ' 


ANTYPE,TRANS
NLGEOM,1
NROPT,FULL, ,OFF
TRNOPT,FULL 
EQSLV, , ,0, ,DELE  
MSAVE,0 
TOFFST,273, 
CNVTOL,F, ,0.2,2, , 
TIME,88 
AUTOTS,-1   
DELTIM,2, , ,1  
KBC,0   
!*  
TSRES,ERASE 
/STATUS,SOLU
SOLVE   
!* 
LDREAD,TEMP,,,88.02, ,'wedu','rth',' ' 
TIME,88.02  
AUTOTS,-1   
DELTIM,0.02, , ,1  
KBC,0   
!*  
TSRES,ERASE 
/STATUS,SOLU
SOLVE   
!* 


LDREAD,TEMP,,,90.25, ,'wedu','rth',' ' 
TIME,90.25  
AUTOTS,-1   
DELTIM,0.25, , ,1   
KBC,1   
!*  
TSRES,ERASE 
/STATUS,SOLU
SOLVE   


/POST26 
FILE,'30cm','rth','.'   
/UI,COLL,1  
NUMVAR,200  
SOLU,191,NCMIT  
STORE,MERGE 
FILLDATA,191,,,,1,1 
REALVAR,191,191 
!*  
NSOL,2,13828,TEMP,,TEMP_4   
STORE,MERGE 
!*  
NSOL,3,232,TEMP,, TEMP_3
STORE,MERGE 

NSEL,S,LOC,Y,0.21   
NSEL,R,LOC,Z,6  

/POST1 
FLST,2,51,1 
FITEM,2,7768
FITEM,2,7770
FITEM,2,7771
FITEM,2,7772
FITEM,2,7773
FITEM,2,7769
FITEM,2,11729   
FITEM,2,11730   
FITEM,2,11731   
FITEM,2,11732   
FITEM,2,11733   
FITEM,2,11734   
FITEM,2,11735   
FITEM,2,11736   
FITEM,2,11737   
FITEM,2,11728   
FITEM,2,15089   
FITEM,2,15090   
FITEM,2,15091   
FITEM,2,15092   
FITEM,2,15093   
FITEM,2,15094   
FITEM,2,15095   
FITEM,2,15096   
FITEM,2,15097   
FITEM,2,15088   
FITEM,2,20189   
FITEM,2,20190   
FITEM,2,20191   
FITEM,2,20192   
FITEM,2,20193   
FITEM,2,20194   
FITEM,2,20195   
FITEM,2,20196   
FITEM,2,20197   
FITEM,2,20188   
FITEM,2,24988   
FITEM,2,24989   
FITEM,2,24990   
FITEM,2,24991   
FITEM,2,24992   
FITEM,2,24993   
FITEM,2,24994   
FITEM,2,24995   
FITEM,2,24996   
FITEM,2,13835   
FITEM,2,13839   
FITEM,2,13838   
FITEM,2,13837   
FITEM,2,13836   
FITEM,2,13828   
!*  
PATH,t,51,10,1, 
PPATH,P51X,1
PATH,STAT   
!*  
!*  
PDEF,r,TEMP, ,AVG   
/PBC,PATH, ,0   
!*  
PRANGE,1,0,2,XG,
PRPATH,R
