# Supplementary material for: Thermal Analyses and Responses of Bridge Deck Hydronic Snow Melting System
Source: Hindawi journal article supplement (doi:10.1155/2019/8172494), 2019-01-01
Supplement: f1 [file 8172494.f1.zip › 8172494.f1/spacing of 15mm/depth of 11mm.txt]

/PREP7  
*SET,pi,acos(-1)
*SET,d,0.02
*SET,L,0.2 
*SET,dens,1000  

*SET,carea,pi*(d**2)/4  

*SET,width,0.15
*SET,high,0.11 
*SET,high1,0.21


*SET,T1,-5  
*SET,T2,15  

ET,1,FLUID116   
!*  
KEYOPT,1,1,1
KEYOPT,1,2,2
KEYOPT,1,4,1
KEYOPT,1,5,0
!*  
ET,2,SOLID70

ET,3,SURF152
KEYOPT,3,1,0
KEYOPT,3,2,0
KEYOPT,3,3,0
KEYOPT,3,4,1
KEYOPT,3,5,0
KEYOPT,3,6,0
KEYOPT,3,7,0
KEYOPT,3,8,2
KEYOPT,3,9,0

ET,4,PLANE55

R,1,d,carea,1   
RMORE,pi*d*L/2,pi*d*L/2,0,0.023,0.8,0.3 
R,3, , , , , ,  
MP,KXX,1,2.16   

MP,C,1,4.187
 
MP,DENS,1,1000 
 
MP,VISC,1,3.96  
  
MP,KXX,2,9.66 
 
MP,C,2,0.966
 
MP,DENS,2,2450 


MP,KXX,4,5.54  
 
MP,C,4,1.68
 
MP,DENS,4,2100 


RECTNG,0,5*width,0,high1,
WPSTYLE,,,,,,,,1
wpoff,width/2,high1-high,0  
wpro,,90.000000,
ASBW,       1   


wpro,,,90.000000
aSBW,all  
*do,i,1,4
wpoff,0,0,width 
aSBW,all
*enddo
WPSTYLE,,,,,,,,0

TYPE,   4   
MAT,       2
REAL,       3    


LESIZE,8, , ,11, , , , ,1  
LESIZE,9, , ,11, , , , ,1  

LESIZE,5, , ,6,0.5, , , ,1
LESIZE,6, , ,6,0.5, , , ,1 
LESIZE,23, , ,6,0.5, , , ,1 
*do,i,7,16,3
LESIZE,i, , ,6,0.5, , , ,1 
*enddo
LESIZE,4, , ,5, , , , ,1 
LESIZE,12, , ,5, , , , ,1 

LESIZE,19, , ,10, , , , ,1 
LESIZE,22, , ,10, , , , ,1 
LESIZE,29, , ,10, , , , ,1 
LESIZE,34, , ,10, , , , ,1

MSHAPE,0,2D 
MSHKEY,1
AMESH,all 
TYPE,   2   
MAT,       2
REAL,       3   
ESYS,       0   
ESIZE,0,30, 
VEXT,all, , ,0,0,6,,,, 

NSEL,S,LOC,Y,0.17,0.21  
ESLN,S  
EMODIF,all,MAT,4,  
allsel,all


TYPE,   3   
MAT,       4
REAL,       3   
ESYS,       0  
NSEL,S,LOC,Y,0.21   
ESURF,0    

ALLSEL,ALL 

TYPE,   1  
MAT,       1
REAL,       1   
ESYS,       0   
NSEL,S,LOC,Y,high1-high 
NSEL,R,LOC,X,0.5*width,4.5*width
NSEL,U,LOC,X,0.5*width+0.001,1.5*width-0.001
NSEL,U,LOC,X,1.5*width+0.001,2.5*width-0.001
NSEL,U,LOC,X,2.5*width+0.001,3.5*width-0.001 
NSEL,U,LOC,X,3.5*width+0.001,4.5*width-0.001 
NPLOT   

N,58000,0.5*width,high1-high,0,,,,  
N,58030,0.5*width,high1-high,6,,,,  
FILL,58000,58030,29, , ,1,1,1
 
N,58031,1.5*width,high1-high,6,,,,  
N,58061,1.5*width,high1-high,0,,,,  
FILL,58031,58061,29, , ,1,1,1

N,58062,2.5*width,high1-high,0,,,,  
N,58092,2.5*width,high1-high,6,,,,  
FILL,58062,58092,29, , ,1,1,1
 
N,58093,3.5*width,high1-high,6,,,,  
N,58123,3.5*width,high1-high,0,,,,  
FILL,58093,58123,29, , ,1,1,1

N,58124,4.5*width,high1-high,0,,,,  
N,58154,4.5*width,high1-high,6,,,,  
FILL,58124,58154,29, , ,1,1,1


e,58000,58001,7,1048
*do,i,58001,58028
e,i,i+1,i-56953,i-56952
*enddo
e,58029,58030,1076,925
e,58030,58031,925,3456
e,58031,58032,3456,3573
*do,i,58032,58059
e,i,i+1,61605-i,61604-i
*enddo
e,58060,58061,3545,102
e,58061,58062,102,96
e,58062,58063,96,3603
*do,i,58063,58090
e,i,i+1,i-54460,i-54459
*enddo
e,58091,58092,3631,3450
e,58092,58093,3450,18209
e,58093,58094,18209,18326
*do,i,58094,58121
e,i,i+1,76420-i,76419-i
*enddo
e,58122,58123,18298,587
e,58123,58124,587,55
e,58124,58125,55,2308
*do,i,58125,58152
e,i,i+1,i-55817,i-55816
*enddo
e,58153,58154,2336,2191
ALLSEL,ALL 
ESEL,S,TYPE,,4  
ACLEAR,all
ALLSEL,ALL 


FINISH 
/SOLU 
ESEL,S,TYPE,,2  
ESEL,A,TYPE,,3  
NSLE,S 
IC,all,TEMP,-2.5,  

*DEL,_FNCNAME   
*DEL,_FNCMTID   
*DEL,_FNCCSYS   
*SET,_FNCNAME,'hw'  
*SET,_FNCCSYS,0 
! /INPUT,temp3.func,,,1 
*DIM,%_FNCNAME%,TABLE,6,24,1,,,,%_FNCCSYS%  
!   
! Begin of equation: 2.5*(0.96*sin(PI*({TIME}-9)/12)+0.14*sin(PI*({TIME}-9)/6)) 
! -2.5  
*SET,%_FNCNAME%(0,0,1), 0.0, -999   
*SET,%_FNCNAME%(2,0,1), 0.0 
*SET,%_FNCNAME%(3,0,1), 0.0 
*SET,%_FNCNAME%(4,0,1), 0.0 
*SET,%_FNCNAME%(5,0,1), 0.0 
*SET,%_FNCNAME%(6,0,1), 0.0 
*SET,%_FNCNAME%(0,1,1), 1.0, -1, 0, 9, 0, 0, 1  
*SET,%_FNCNAME%(0,2,1), 0.0, -2, 0, 1, 1, 2, -1 
*SET,%_FNCNAME%(0,3,1),   0, -1, 0, 3.14159265358979310, 0, 0, -2   
*SET,%_FNCNAME%(0,4,1), 0.0, -3, 0, 1, -1, 3, -2
*SET,%_FNCNAME%(0,5,1), 0.0, -1, 0, 12, 0, 0, -3
*SET,%_FNCNAME%(0,6,1), 0.0, -2, 0, 1, -3, 4, -1
*SET,%_FNCNAME%(0,7,1), 0.0, -1, 9, 1, -2, 0, 0 
*SET,%_FNCNAME%(0,8,1), 0.0, -2, 0, 0.96, 0, 0, -1  
*SET,%_FNCNAME%(0,9,1), 0.0, -3, 0, 1, -2, 3, -1
*SET,%_FNCNAME%(0,10,1), 0.0, -1, 0, 9, 0, 0, 1 
*SET,%_FNCNAME%(0,11,1), 0.0, -2, 0, 1, 1, 2, -1
*SET,%_FNCNAME%(0,12,1), 0.0, -1, 0, 3.14159265358979310, 0, 0, -2  
*SET,%_FNCNAME%(0,13,1), 0.0, -4, 0, 1, -1, 3, -2   
*SET,%_FNCNAME%(0,14,1), 0.0, -1, 0, 6, 0, 0, -4
*SET,%_FNCNAME%(0,15,1), 0.0, -2, 0, 1, -4, 4, -1   
*SET,%_FNCNAME%(0,16,1), 0.0, -1, 9, 1, -2, 0, 0
*SET,%_FNCNAME%(0,17,1), 0.0, -2, 0, 0.14, 0, 0, -1 
*SET,%_FNCNAME%(0,18,1), 0.0, -4, 0, 1, -2, 3, -1   
*SET,%_FNCNAME%(0,19,1), 0.0, -1, 0, 1, -3, 1, -4   
*SET,%_FNCNAME%(0,20,1), 0.0, -2, 0, 2.5, 0, 0, -1  
*SET,%_FNCNAME%(0,21,1), 0.0, -3, 0, 1, -2, 3, -1   
*SET,%_FNCNAME%(0,22,1), 0.0, -1, 0, 2.5, 0, 0, -3  
*SET,%_FNCNAME%(0,23,1), 0.0, -2, 0, 1, -3, 2, -1   
*SET,%_FNCNAME%(0,24,1), 0.0, 99, 0, 1, -2, 0, 0
! End of equation: 2.5*(0.96*sin(PI*({TIME}-9)/12)+0.14*sin(PI*({TIME}-9)/6))-2 
! .5
!-->


ESEL,S,TYPE,,3  
SFE,all,1,CONV, ,26.3   
SFE,all,1,CONV,2, %HW% 

ALLSEL,ALL 


ASEL,S,LOC,X,0  
ASEL,A,LOC,X,5*width
ASEL,A,LOC,Y,0  
ASEL,A,LOC,Z,0  
ASEL,A,LOC,Z,6 
NSLA,S,1
SF,all,HFLUX,0 
ALLSEL,ALL 


ANTYPE,4
DELTIM,2,0,0
OUTRES,ERASE
OUTRES,ALL,1
KBC,0.0 
TIME,88
TIMINT,1
TOFFST,273, 

solve

DELTIM,0.02,0,0  
TIME,88.02
d,58000,temp,T2 
esel,s,ename,,fluid116  
sfe,all,,hflux,,2160*carea*dens 
ALLSEL,ALL  
solve
DELTIM,0.25,0,0  
TIME,90.25
solve


/POST26 
NUMVAR,200  
FILLDATA,191,,,,1,1 
REALVAR,191,191 
!*  
NSOL,2,12919,TEMP,,TEMP_4   
STORE,MERGE 
!*  
NSOL,3,163,TEMP,, TEMP_3
STORE,MERGE 
PRVAR,2,3,  


NSEL,S,LOC,Y,0.21   
NSEL,R,LOC,Z,6  
/POST1  
!*  
FLST,2,51,1 
FITEM,2,5749
FITEM,2,5751
FITEM,2,5752
FITEM,2,5753
FITEM,2,5754
FITEM,2,5750
FITEM,2,9620
FITEM,2,9621
FITEM,2,9622
FITEM,2,9623
FITEM,2,9624
FITEM,2,9625
FITEM,2,9626
FITEM,2,9627
FITEM,2,9628
FITEM,2,9619
FITEM,2,14900   
FITEM,2,14901   
FITEM,2,14902   
FITEM,2,14903   
FITEM,2,14904   
FITEM,2,14905   
FITEM,2,14906   
FITEM,2,14907   
FITEM,2,14908   
FITEM,2,14899   
FITEM,2,20300   
FITEM,2,20301   
FITEM,2,20302   
FITEM,2,20303   
FITEM,2,20304   
FITEM,2,20305   
FITEM,2,20306   
FITEM,2,20307   
FITEM,2,20308   
FITEM,2,20299   
FITEM,2,25489   
FITEM,2,25490   
FITEM,2,25491   
FITEM,2,25492   
FITEM,2,25493   
FITEM,2,25494   
FITEM,2,25495   
FITEM,2,25496   
FITEM,2,25497   
FITEM,2,12930   
FITEM,2,12934   
FITEM,2,12933   
FITEM,2,12932   
FITEM,2,12931   
FITEM,2,12919   
!*  
PATH,t,51,10,1, 
PPATH,P51X,1
PATH,STAT   
!*  
!*  
PDEF,r,TEMP, ,AVG   
/PBC,PATH, ,0   
!*  
PRANGE,1,0,2,XG,
PRPATH,R
